# Supplementary material for: Sustained SREBP-1-dependent lipogenesis as a key mediator of resistance to BRAF-targeted therapy
Source: PubMed Central journal article supplement (PMC6021375; doi:10.1038/s41467-018-04664-0), 2018-06-27

Full unedited gel for Figure 2B

Full unedited gel for Figure 2B – 451lu

SREBP

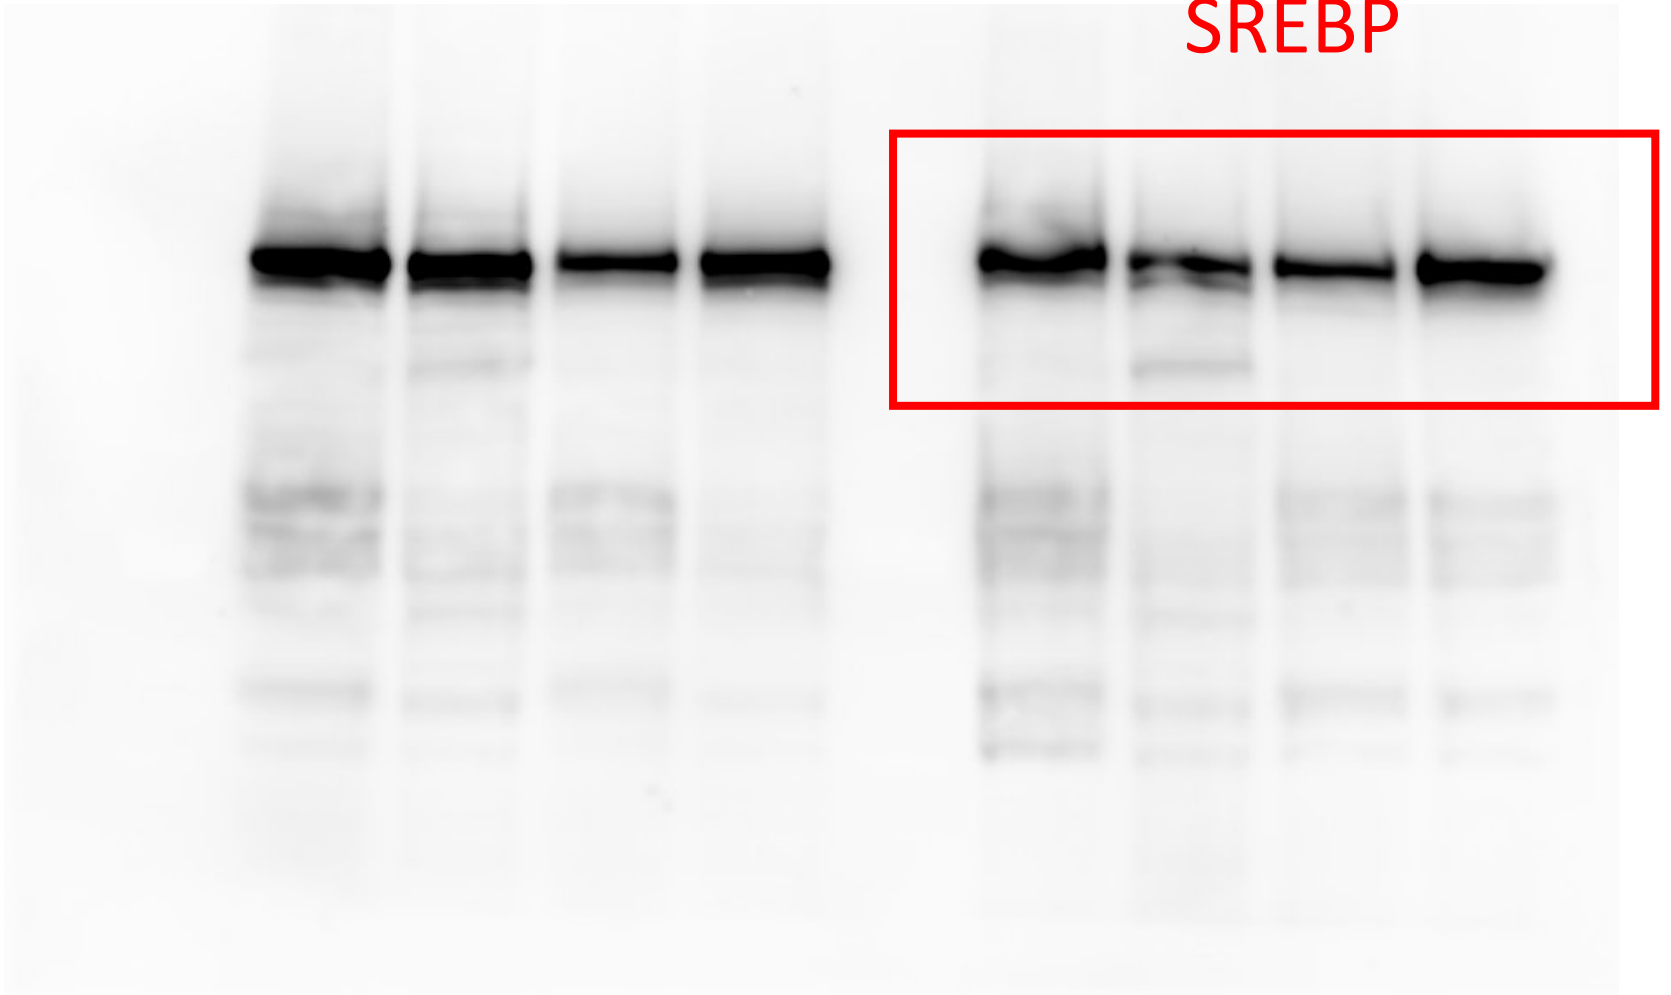

Full unedited gel for Figure 2B – 451lu

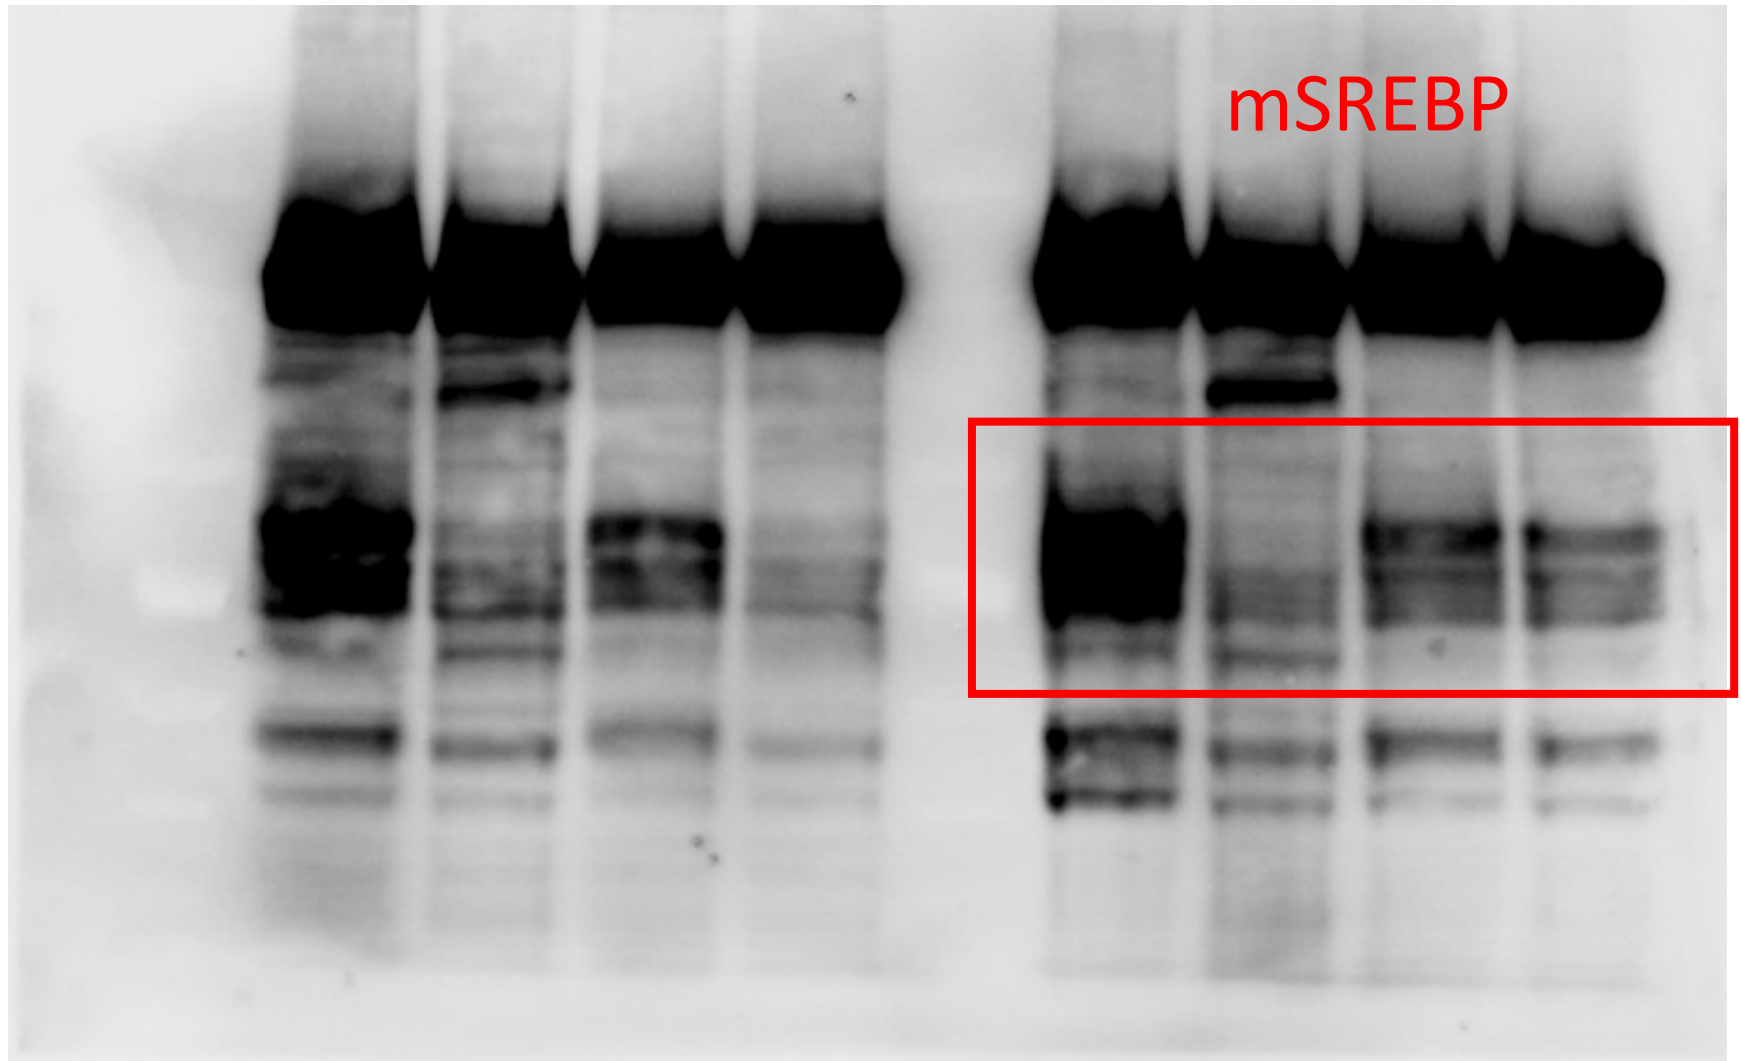

Full unedited gel for Figure 2B – 451lu

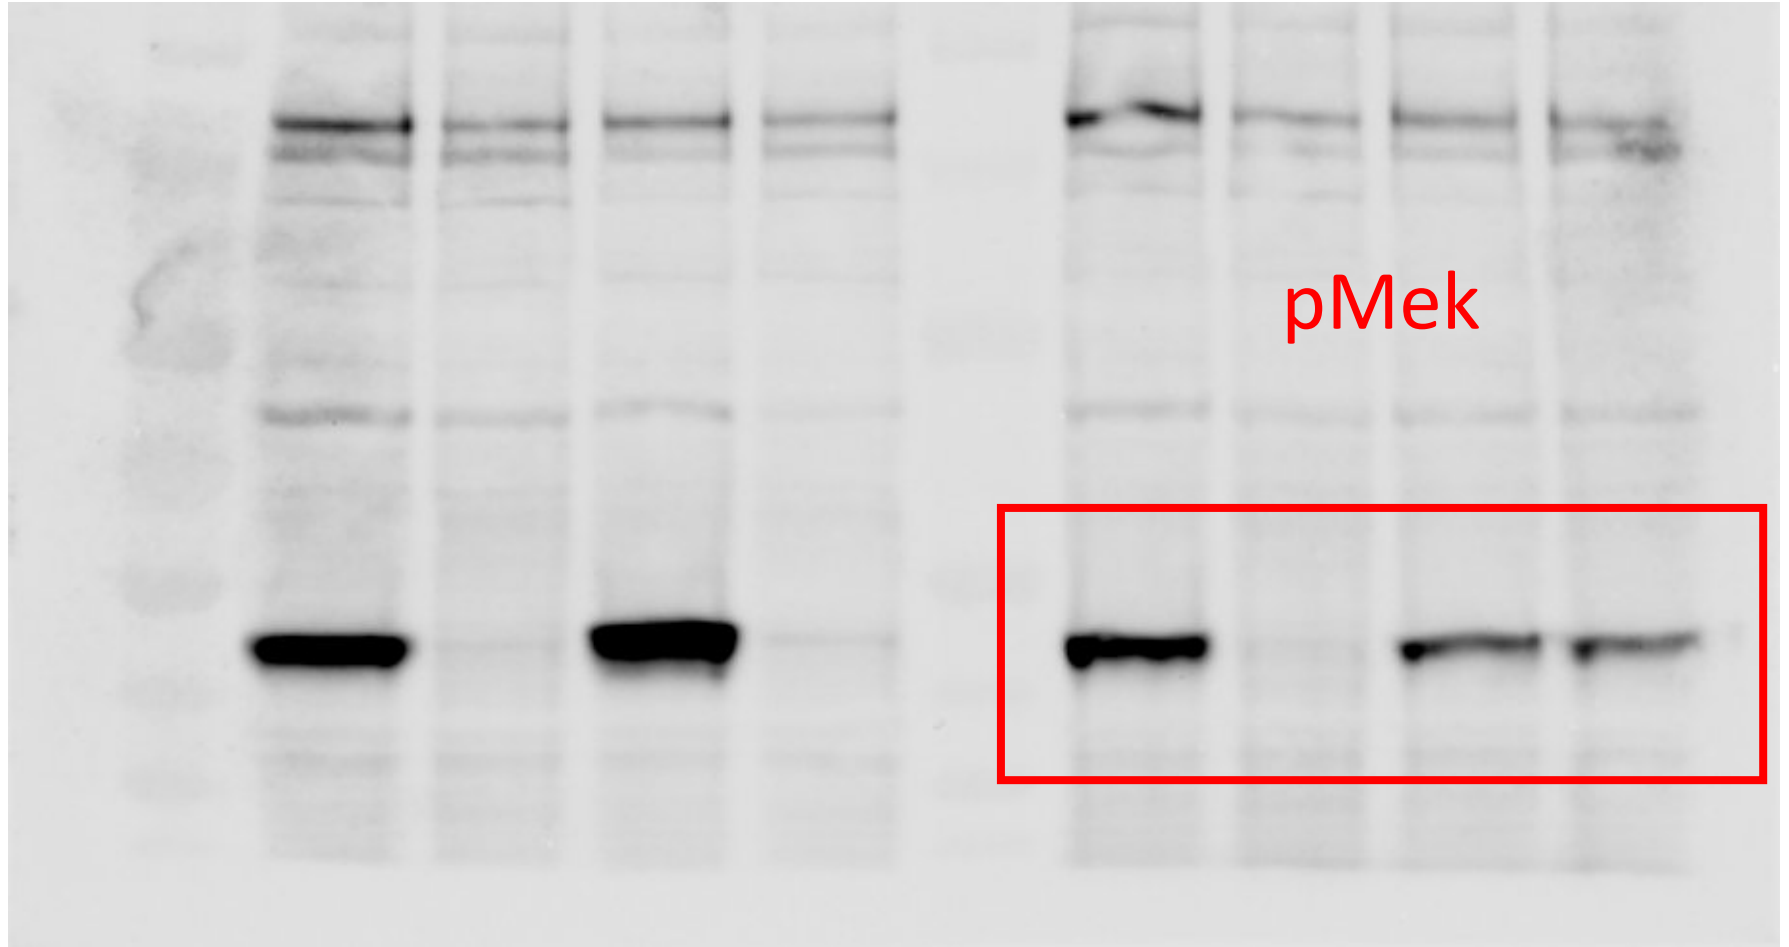

Full unedited gel for Figure 2B – 451lu

GAPDH

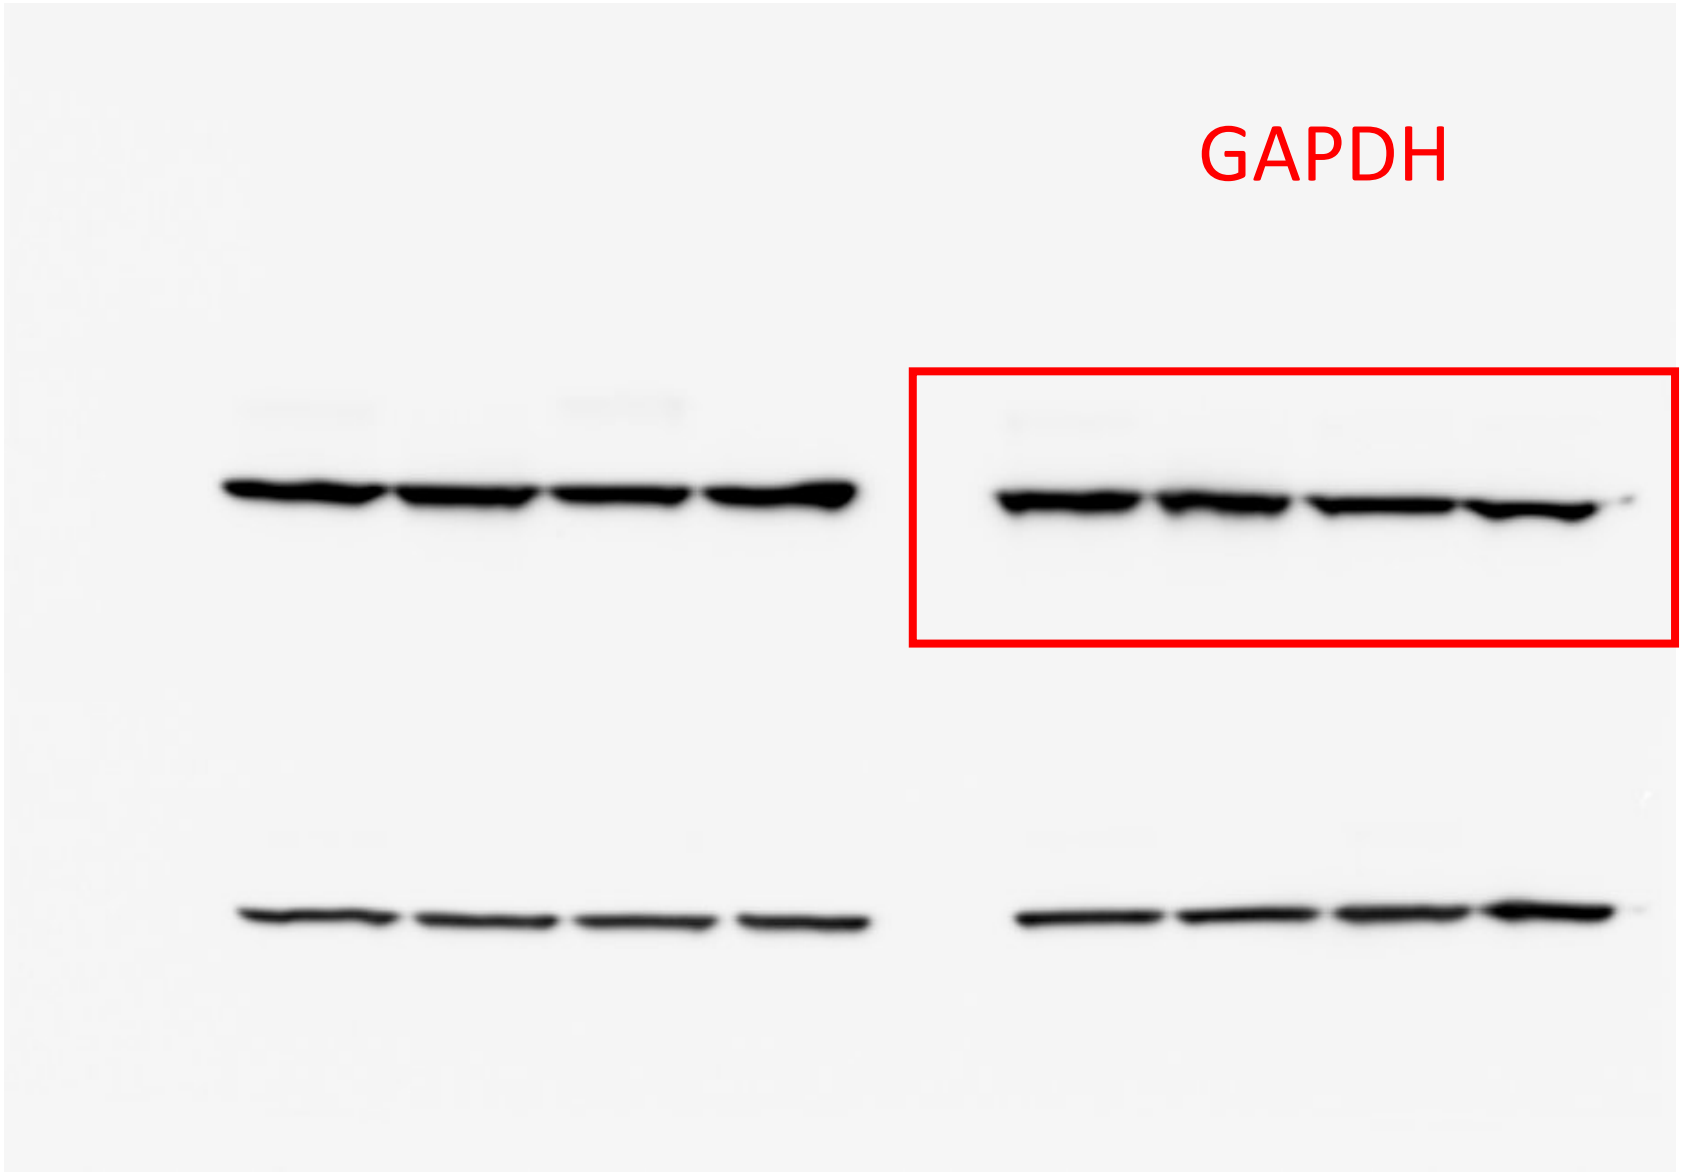

Full unedited gel for Figure 2B – M229

SREBP

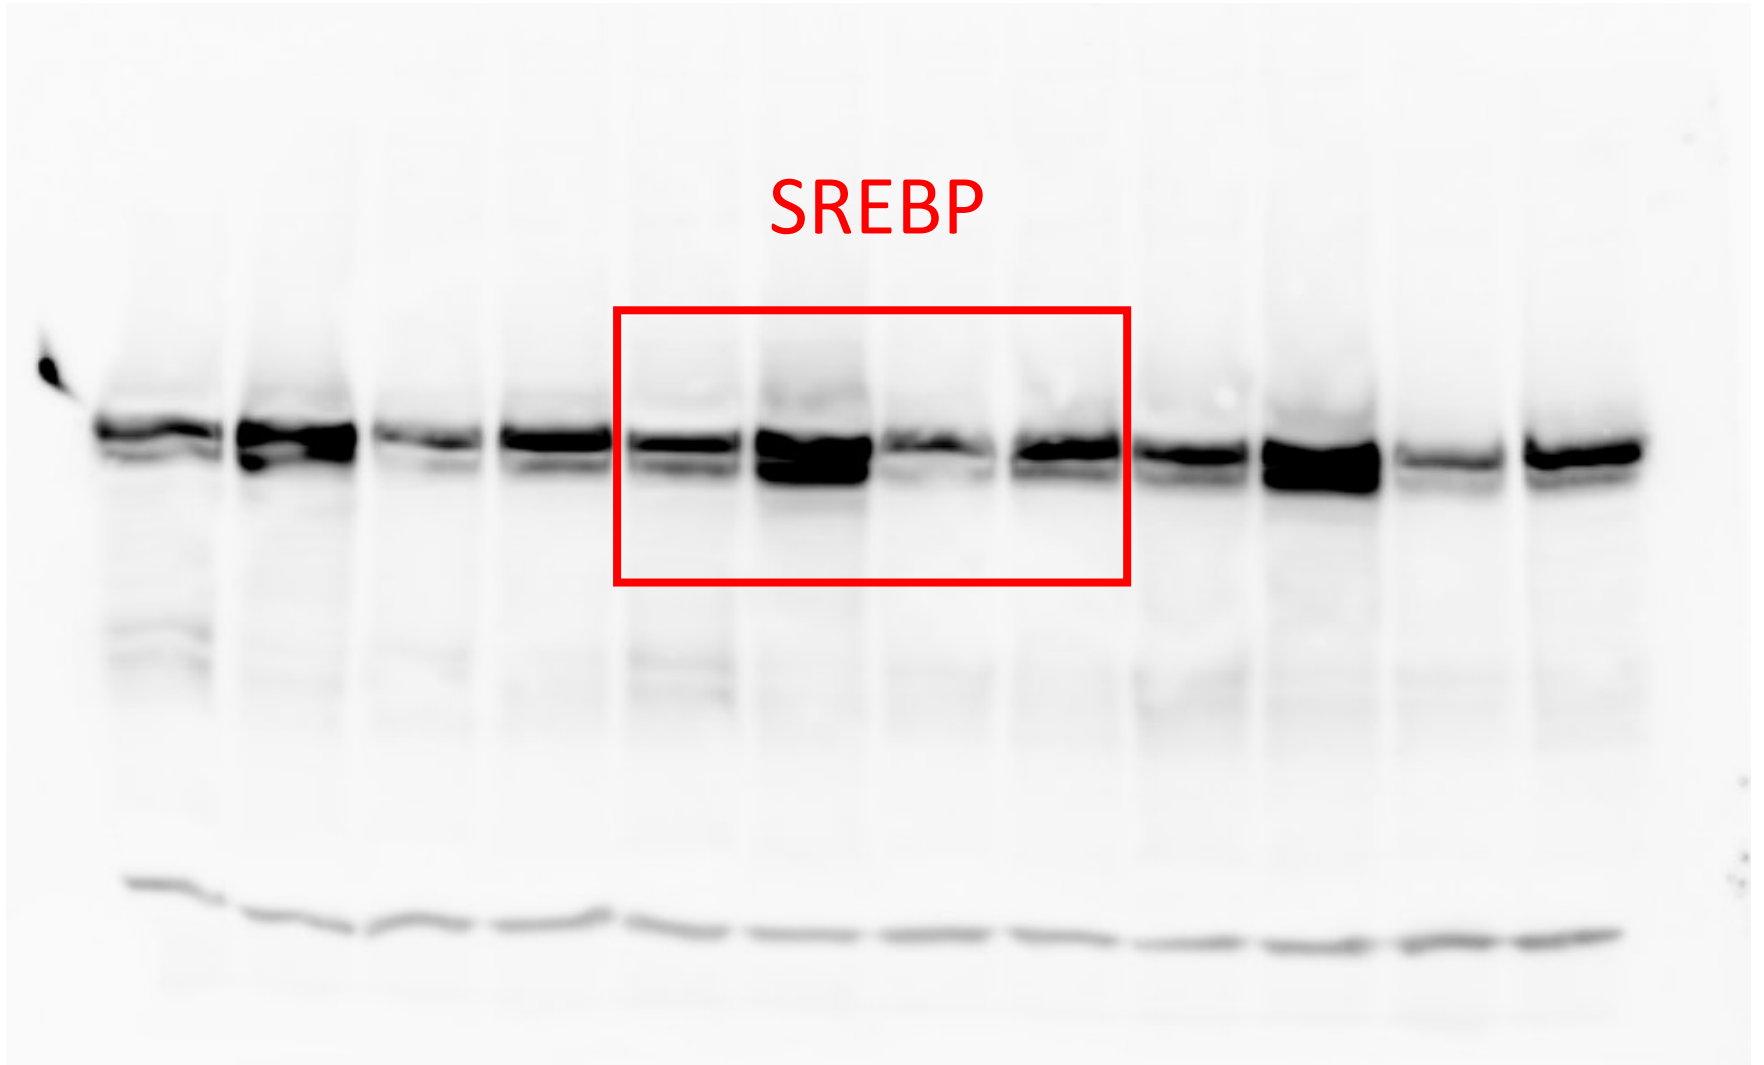

Full unedited gel for Figure 2B – M229

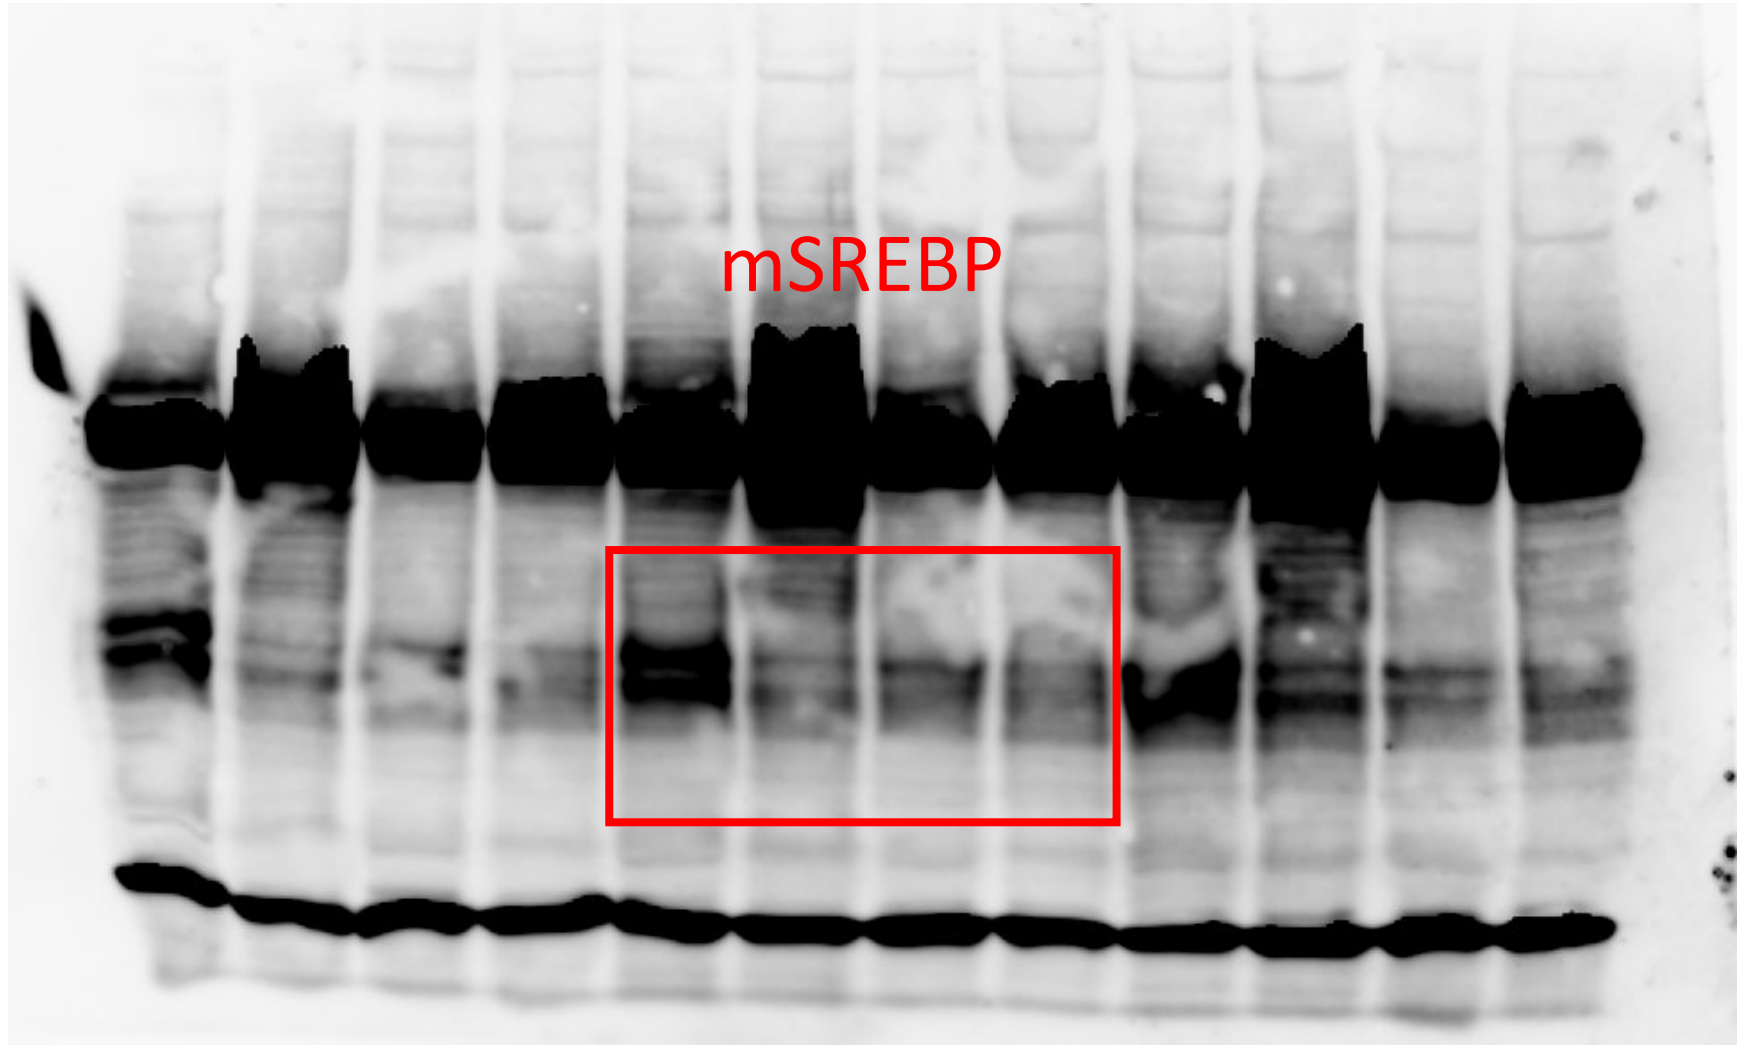

Full unedited gel for Figure 2B – M229

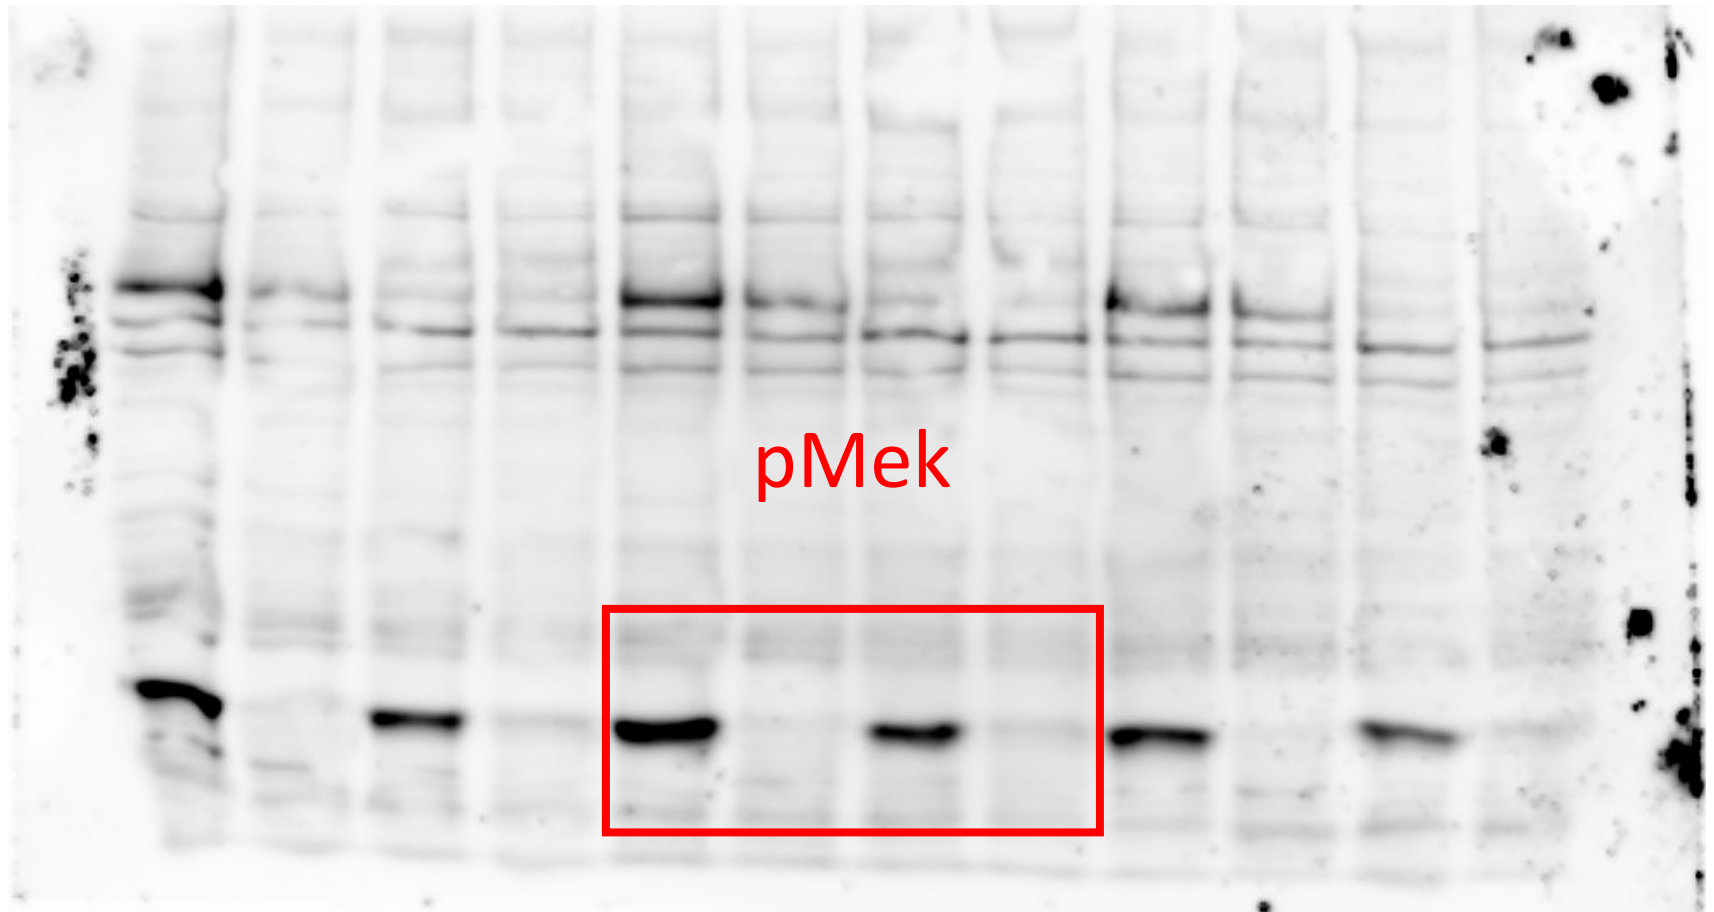



Full unedited gel for Figure 2B – M229

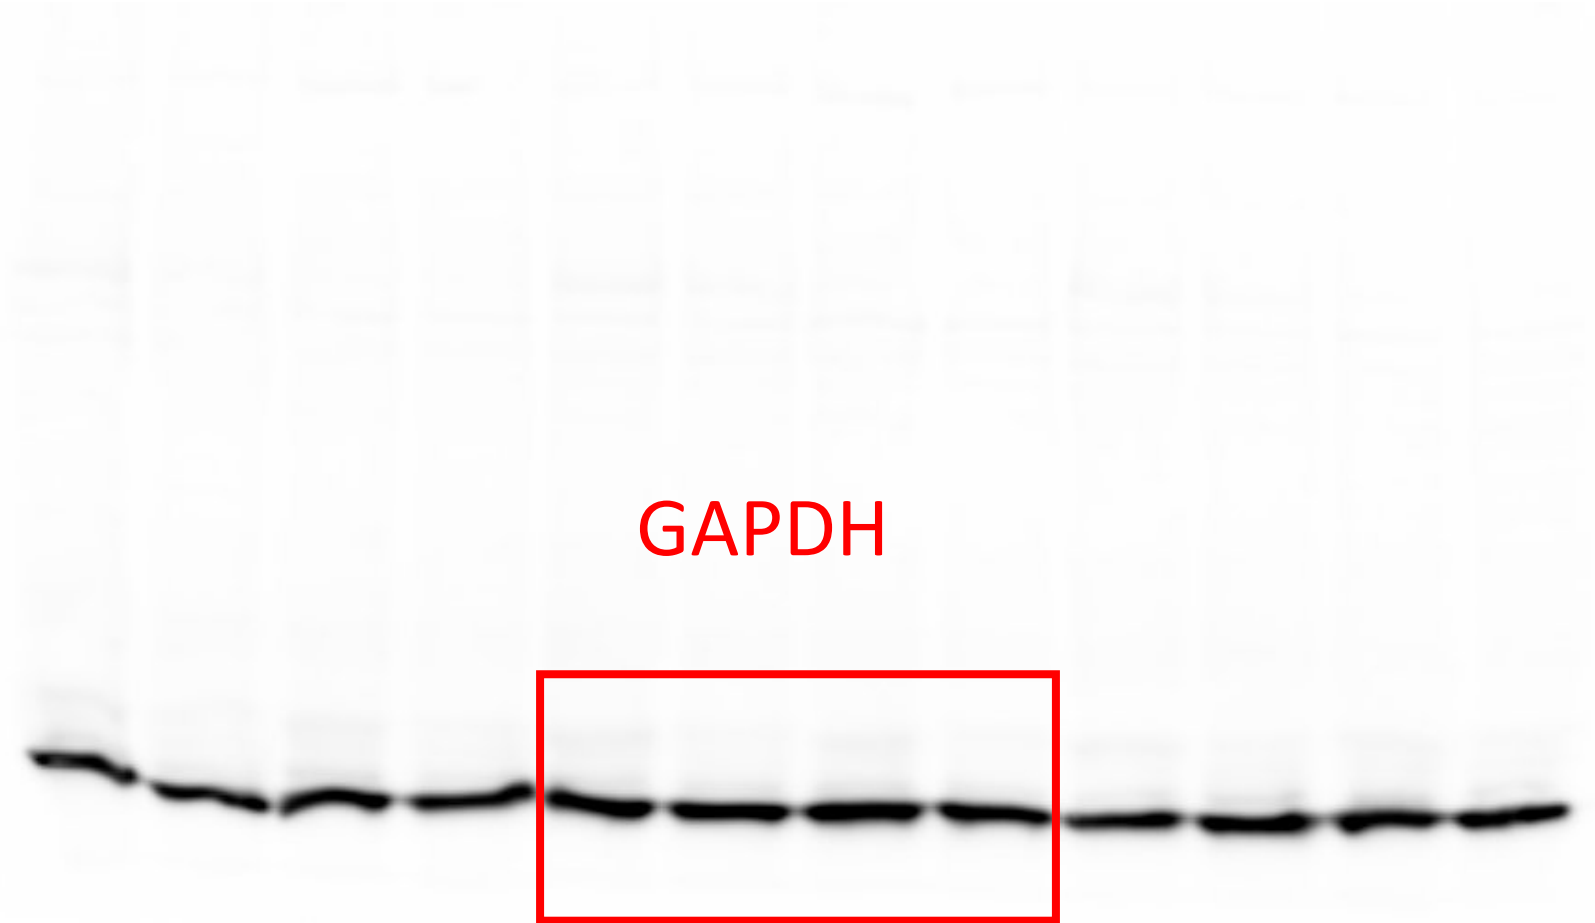

Full unedited gel for Figure 2B – M238

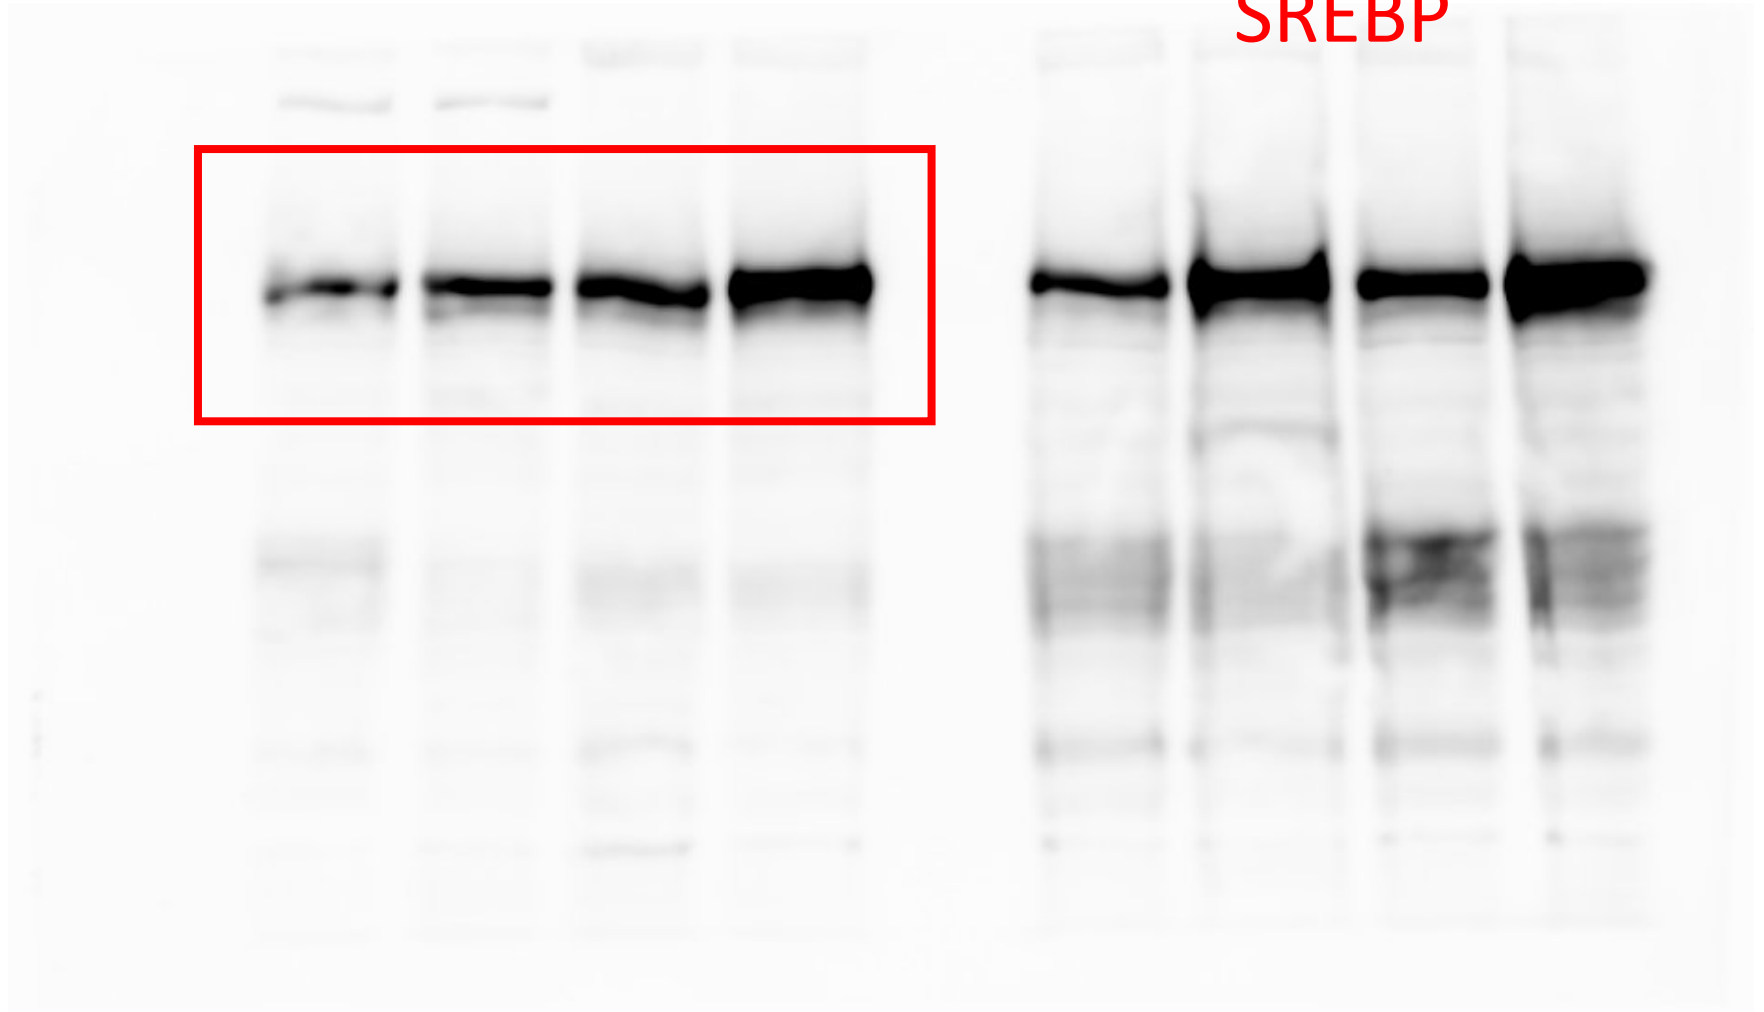

Full unedited gel for Figure 2B – M238

mSREBP

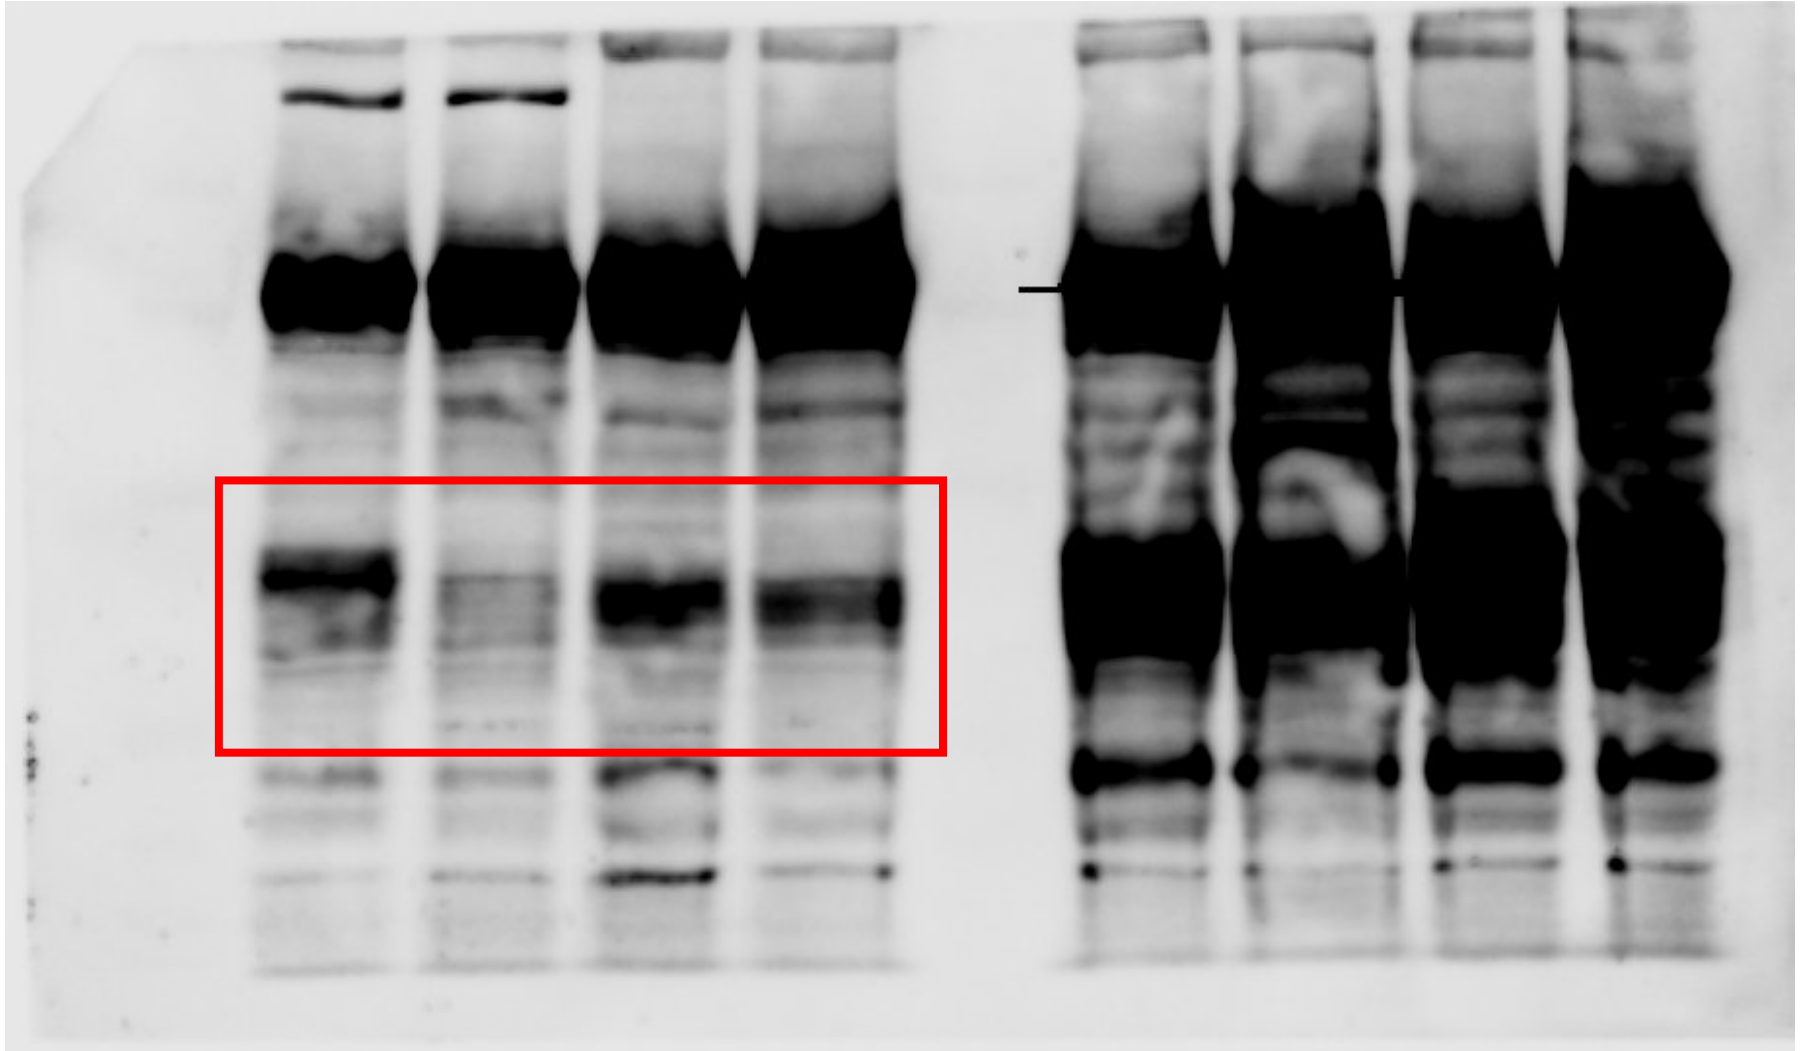

Full unedited gel for Figure 2B – M238

pMek

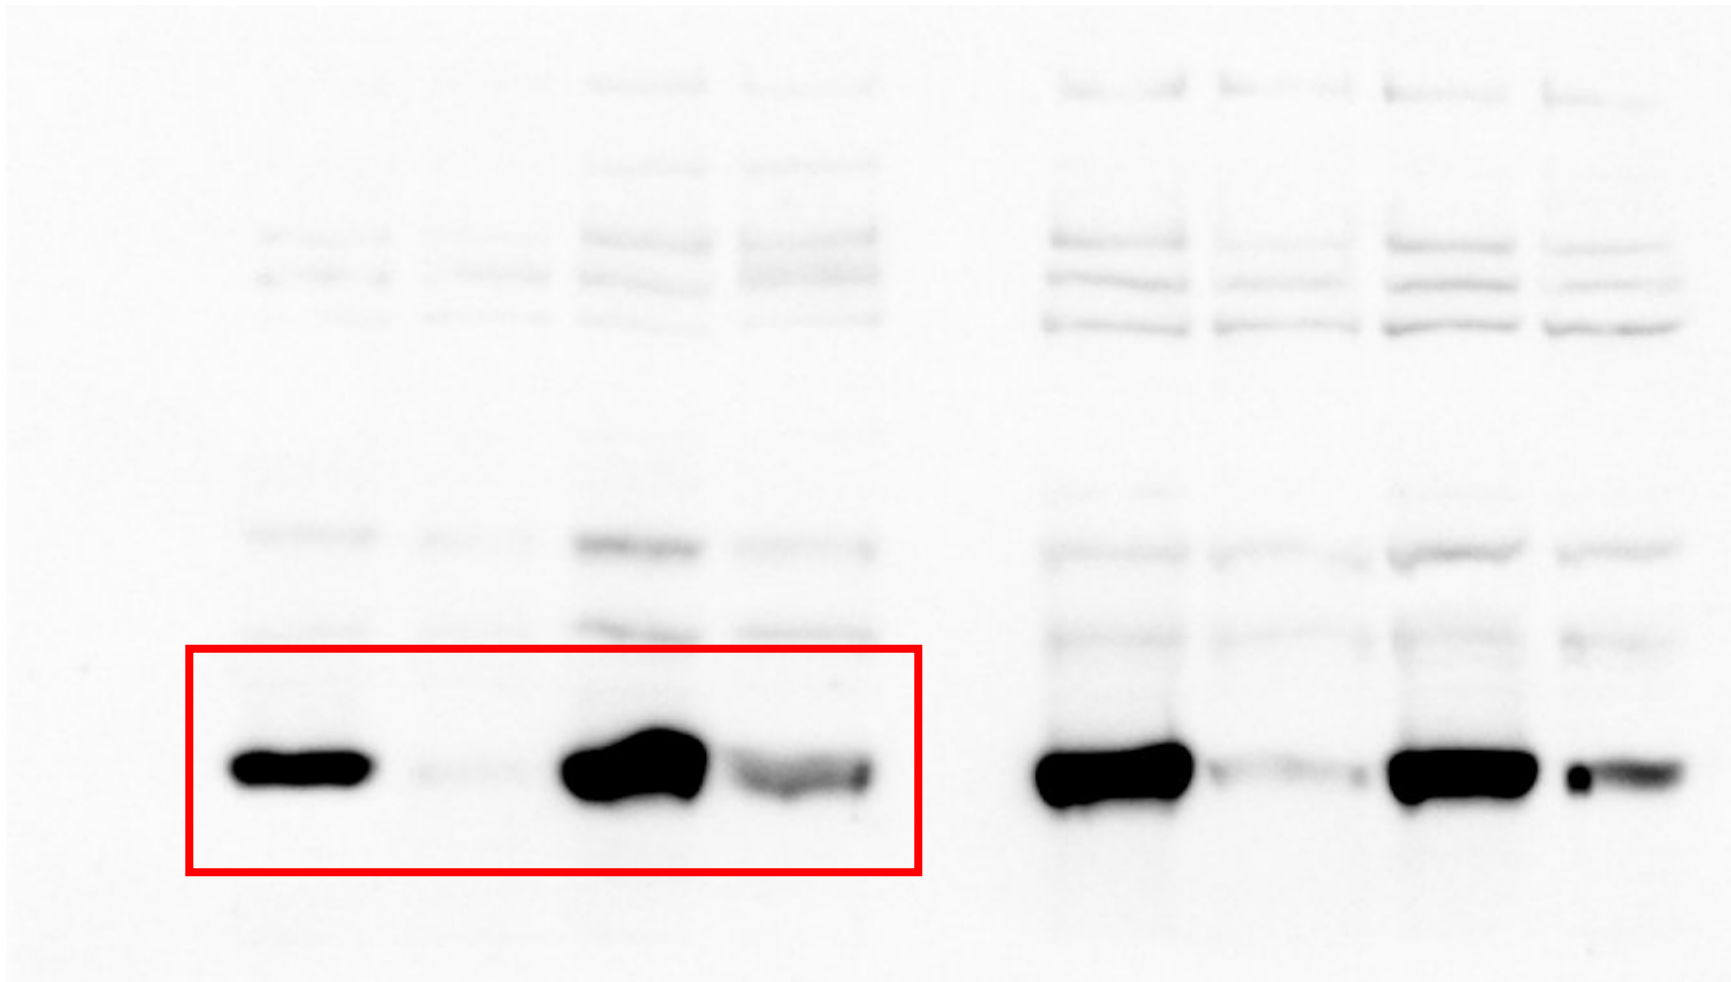

Full unedited gel for Figure 2B – M238

GAPDH

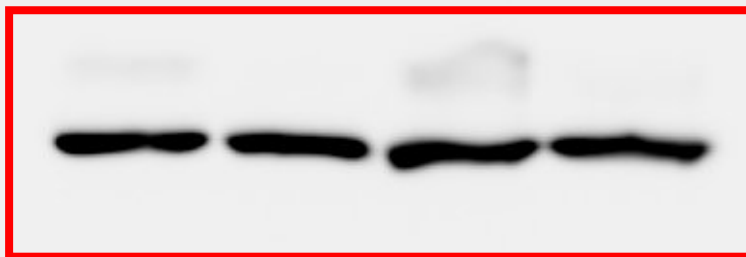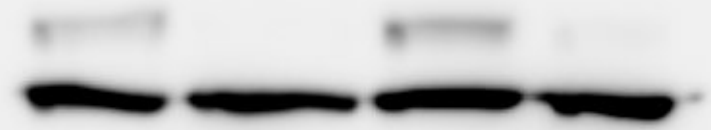

Full unedited gel for Figure 2B – M249

SREBP

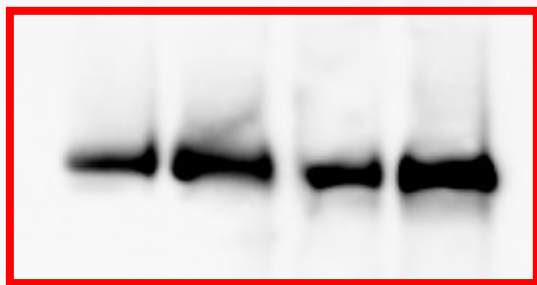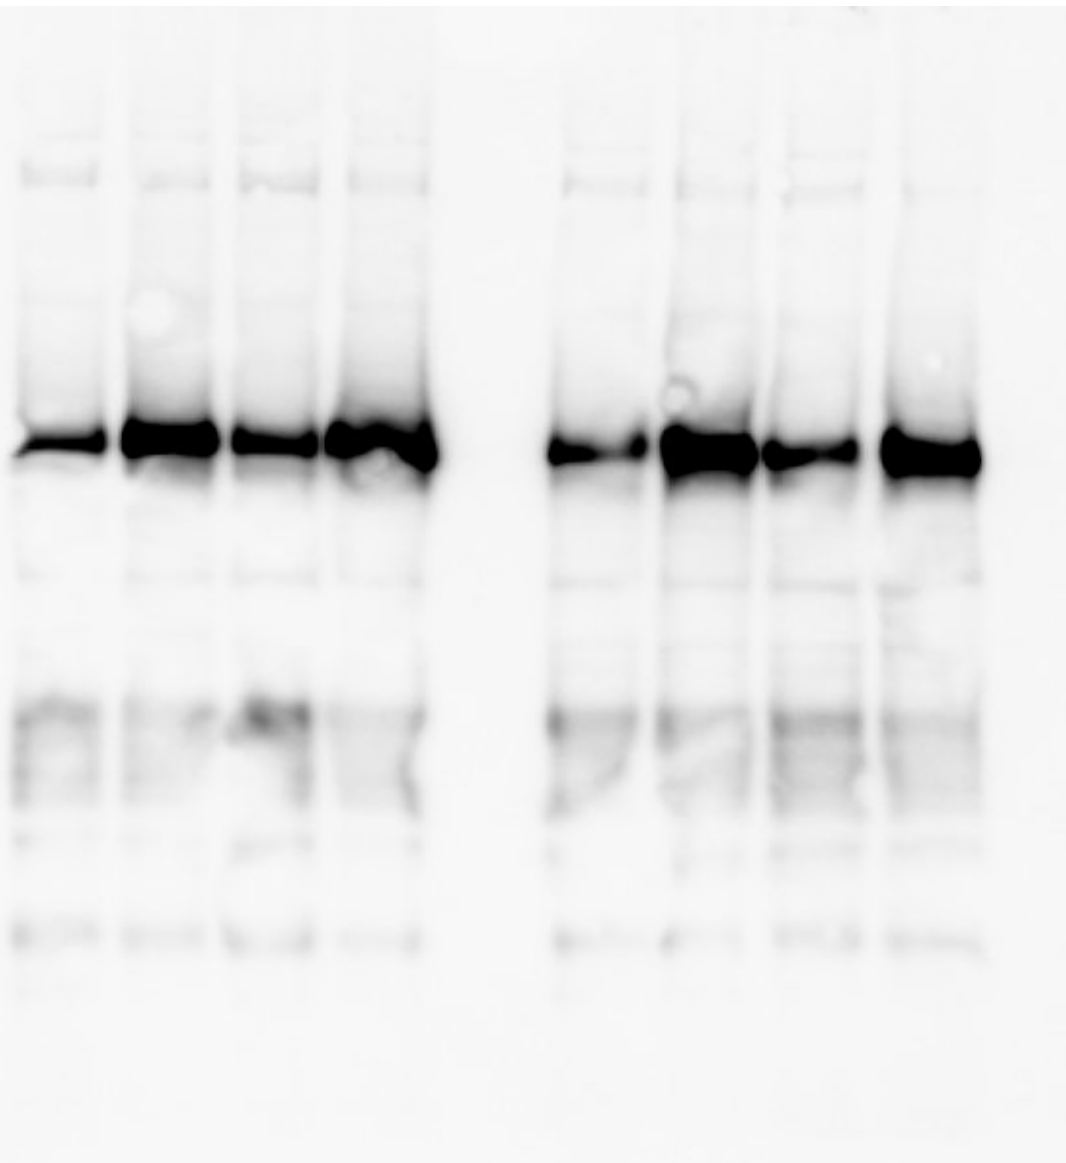

Full unedited gel for Figure 2B – M249

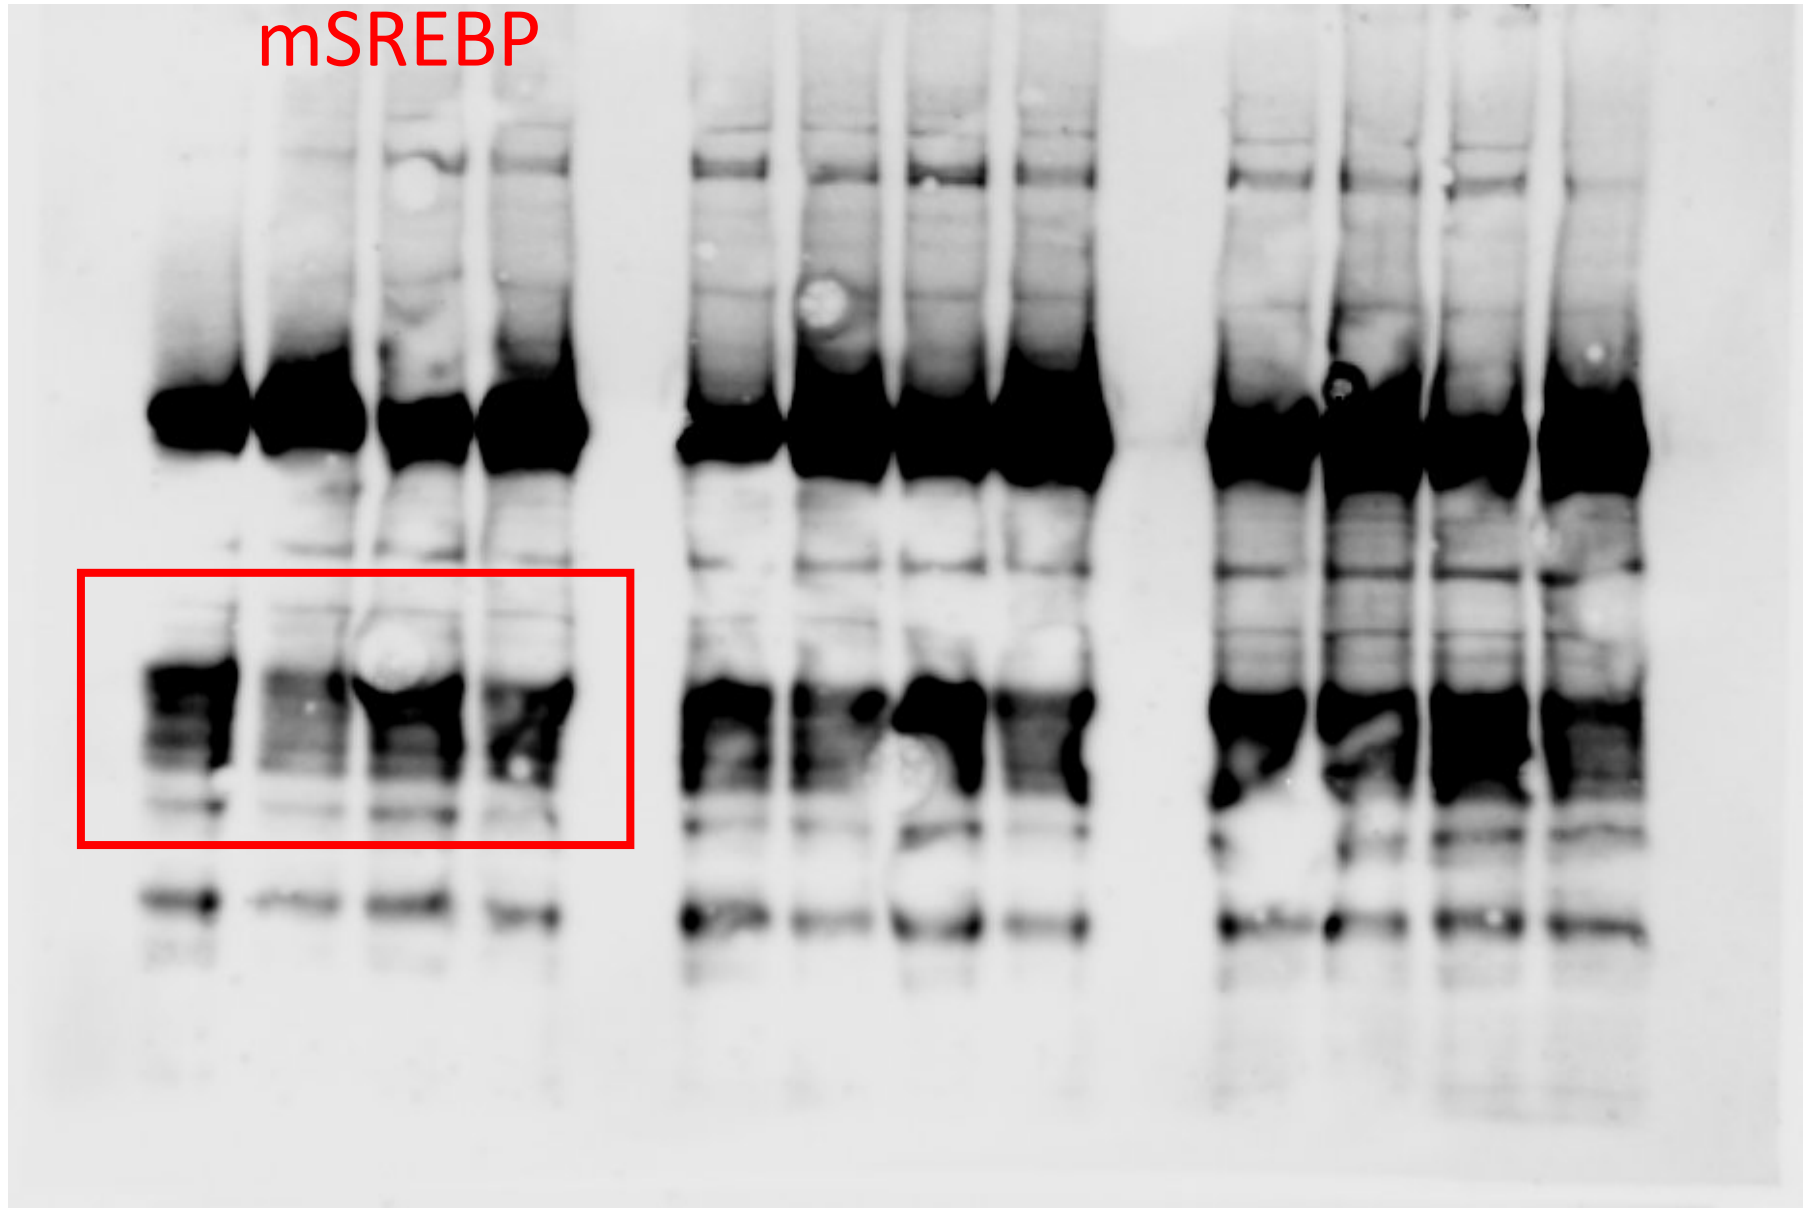

Full unedited gel for Figure 2B – M249

pMek

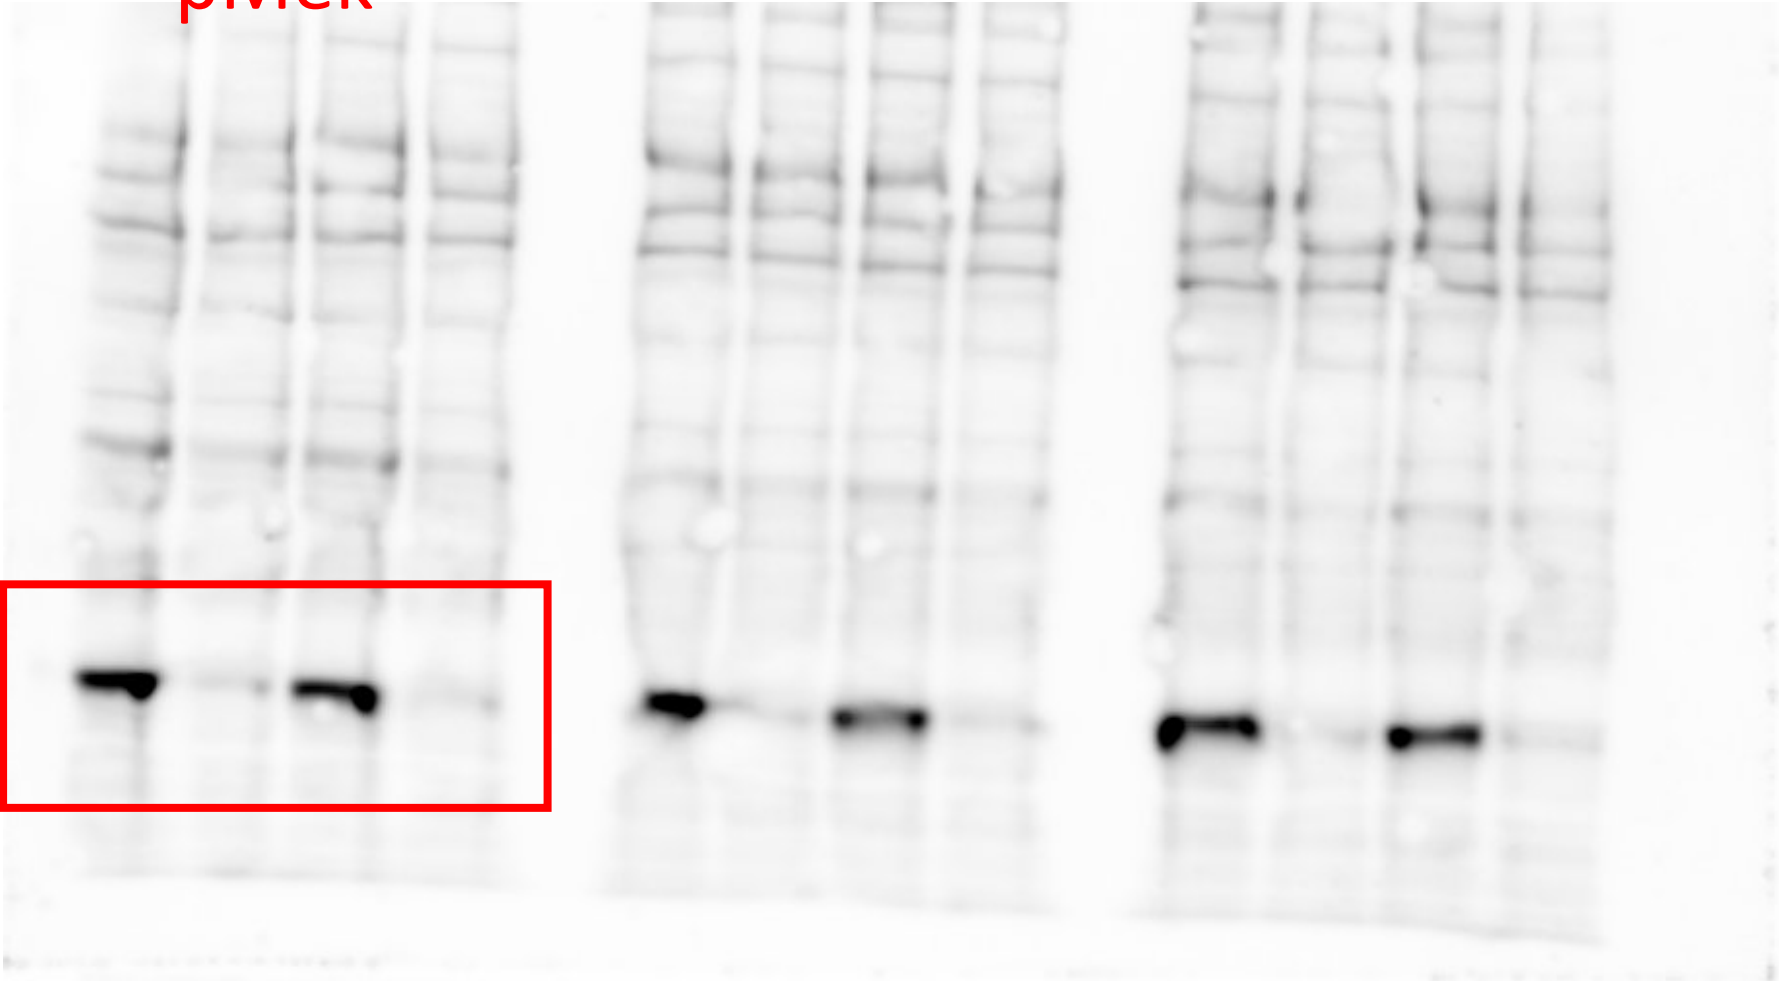



Full unedited gel for Figure 2B – M249

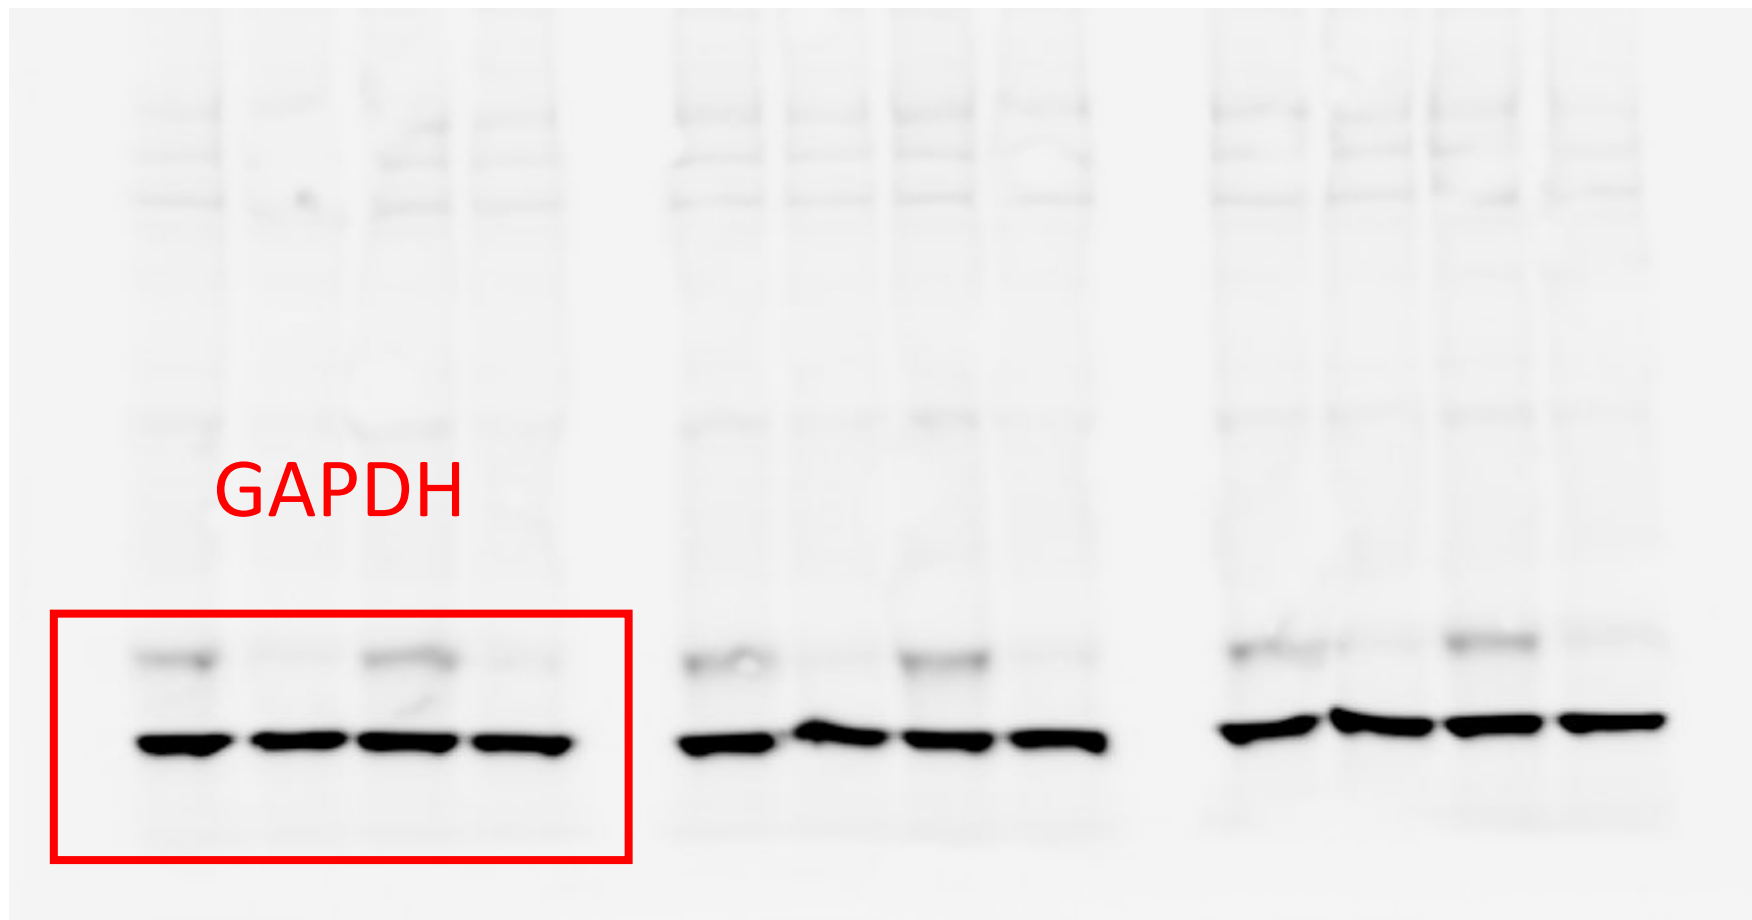

Full unedited gel for Figure 2B – A375 + FLCM

SREBP

A375

FLCM

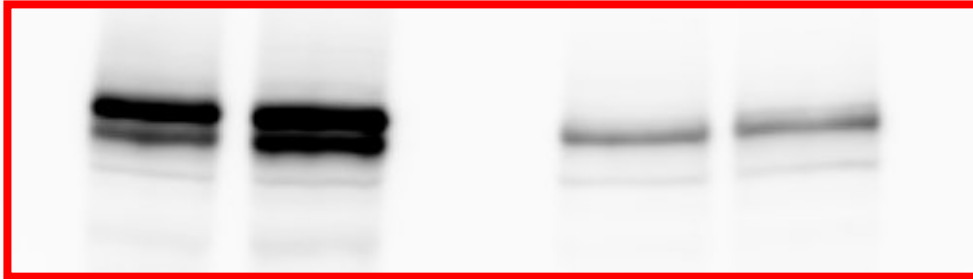

Full unedited gel for Figure 2B – A375 + FLCM

mSREBP

A375

FLCM

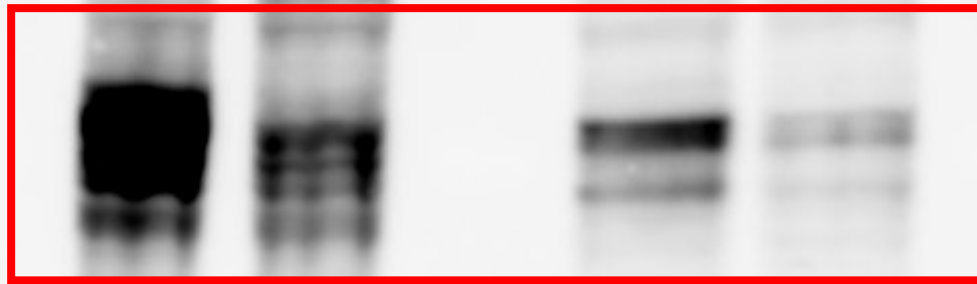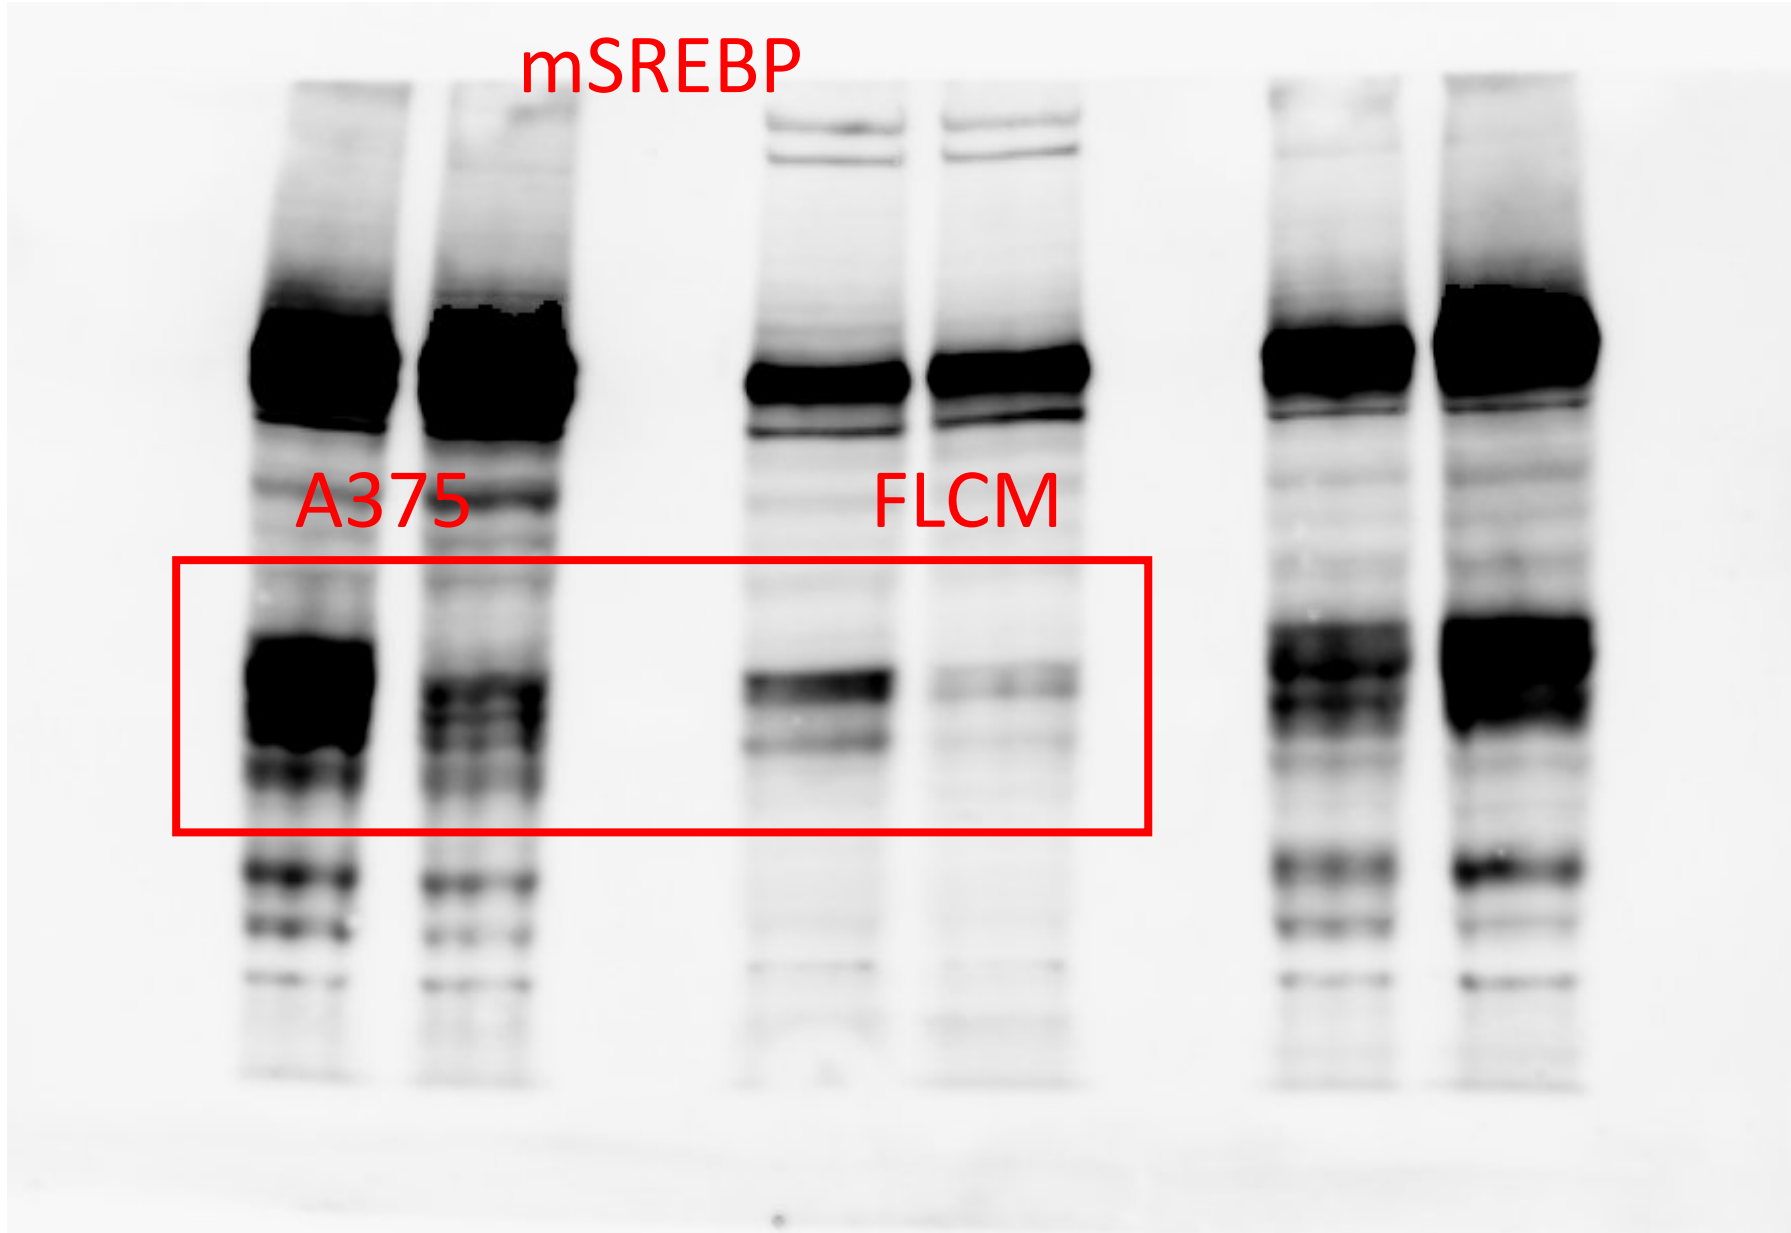

Full unedited gel for Figure 2B – A375 + FLCM

pMek

A375

FLCM

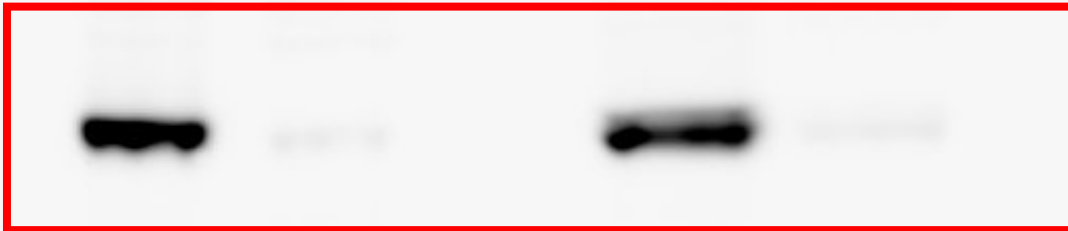

Full unedited gel for Figure 2B – A375 + FLCM

GAPDH

A375

FLCM

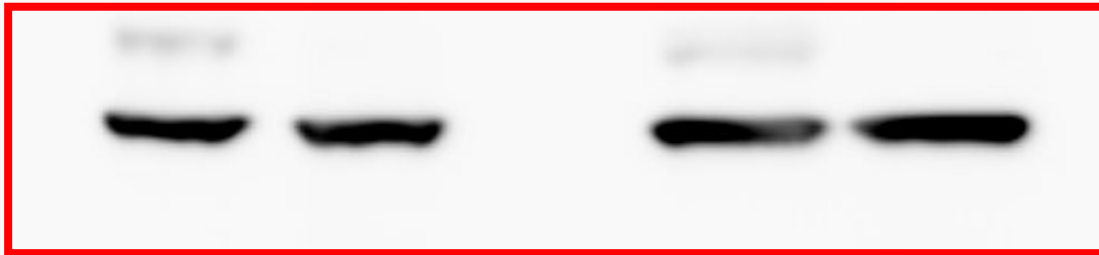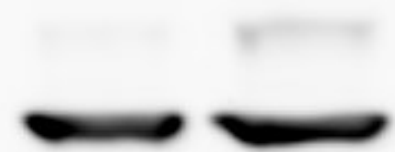

Full unedited gel for Figure 2B – NNHEM

SREBP

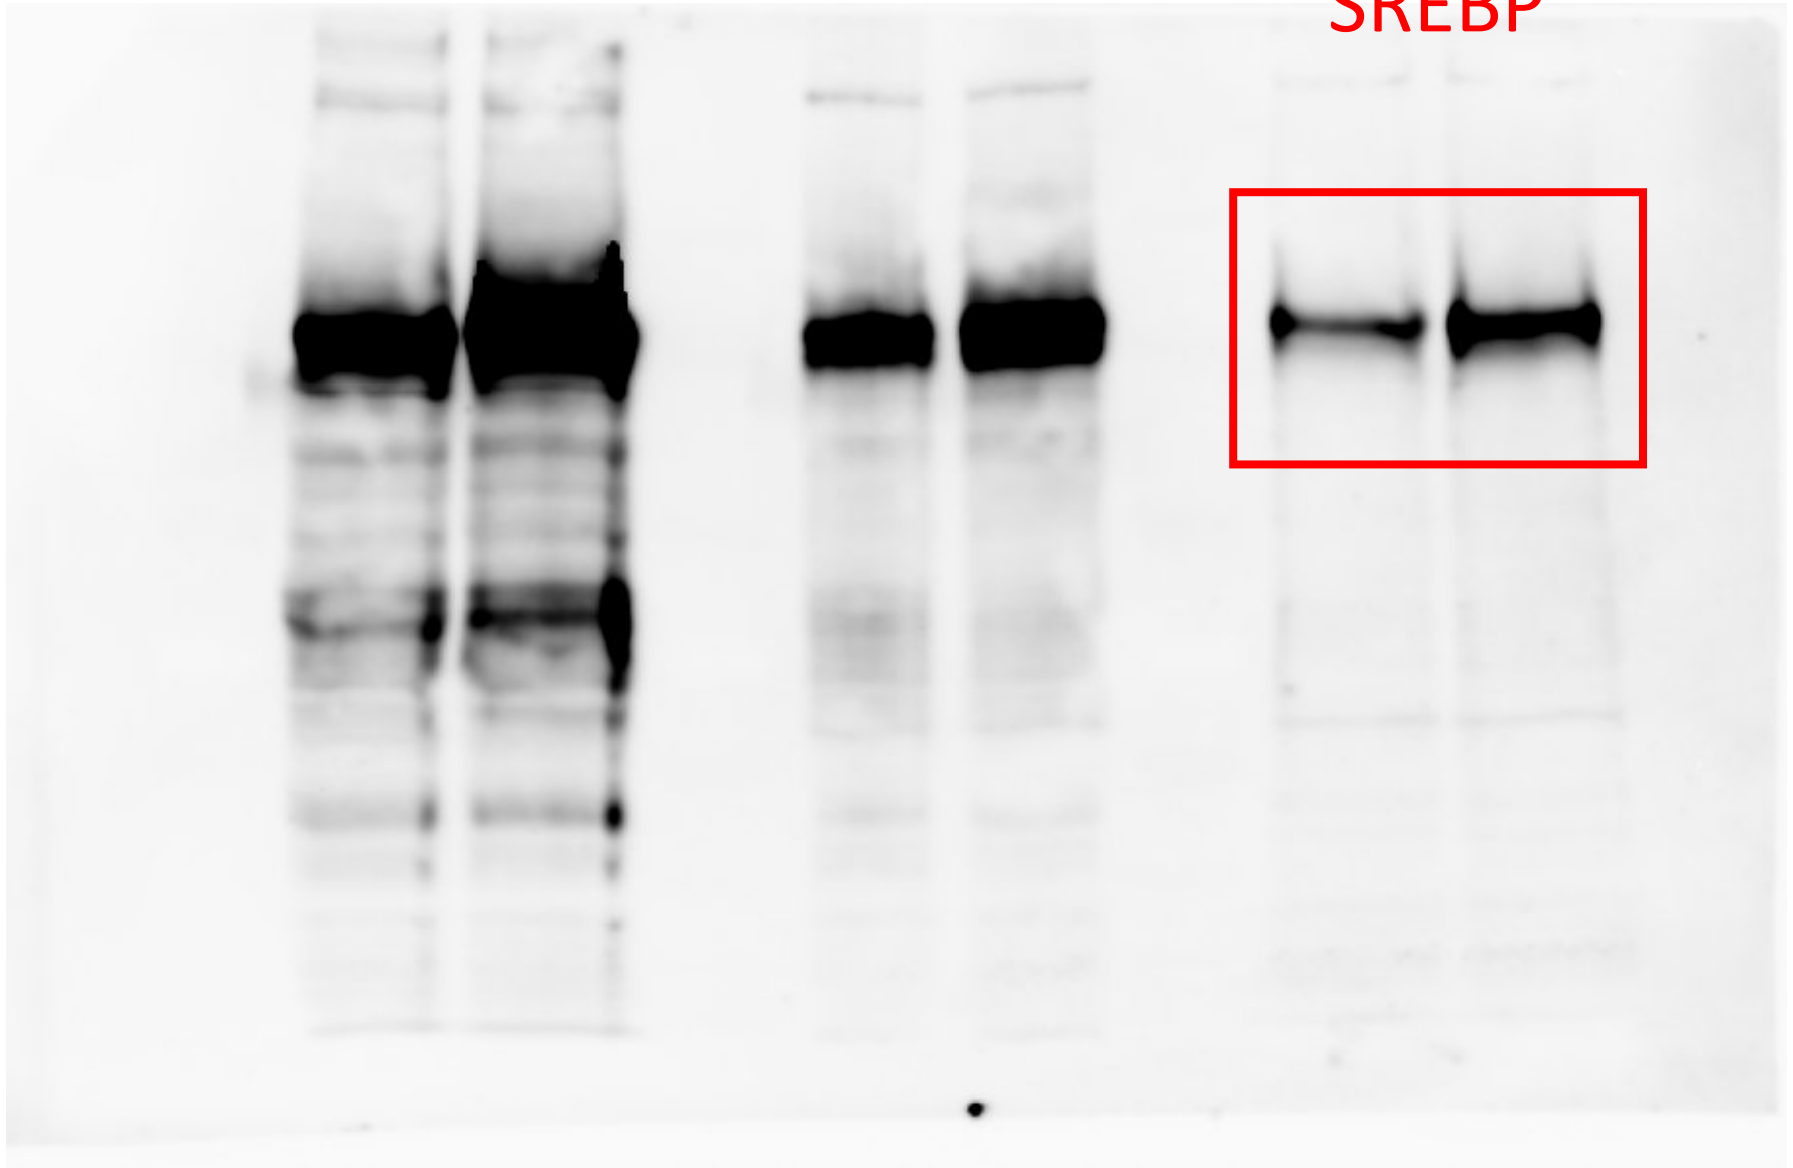

Full unedited gel for Figure 2B – A375 + FLCM

mSREBP

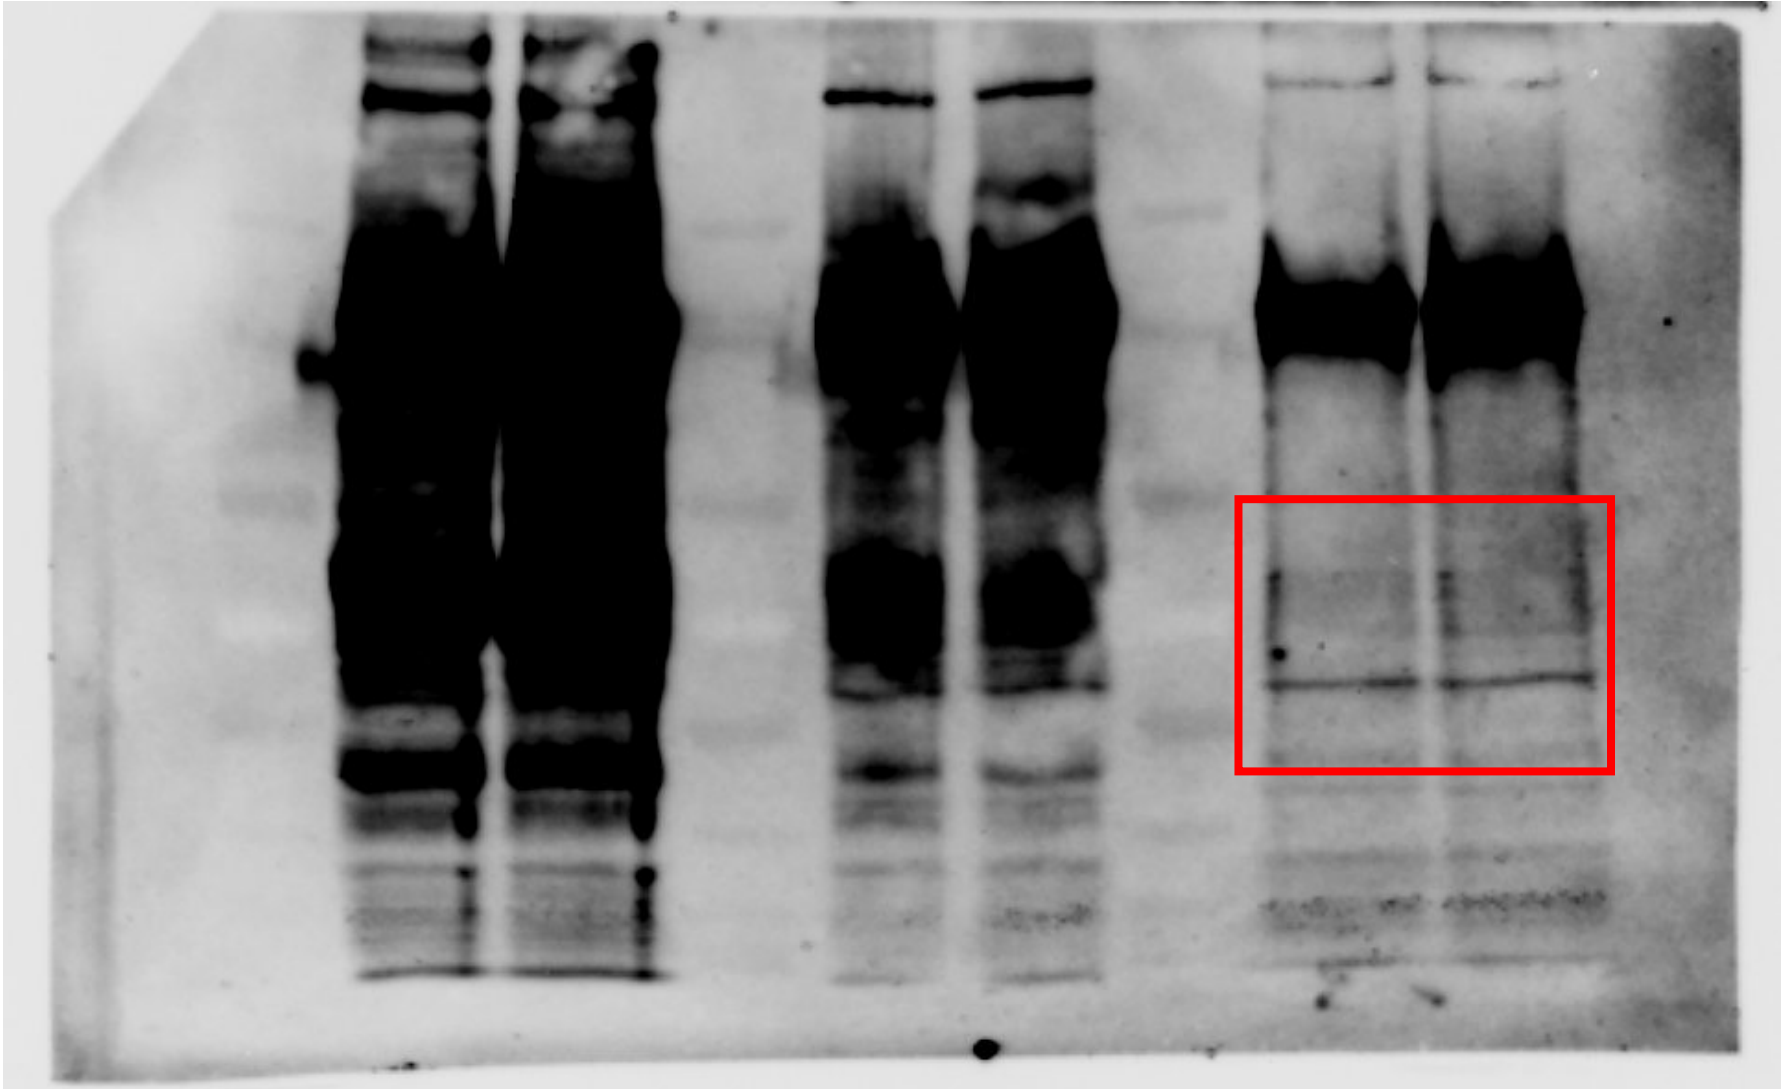

Full unedited gel for Figure 2B – A375 + FLCM

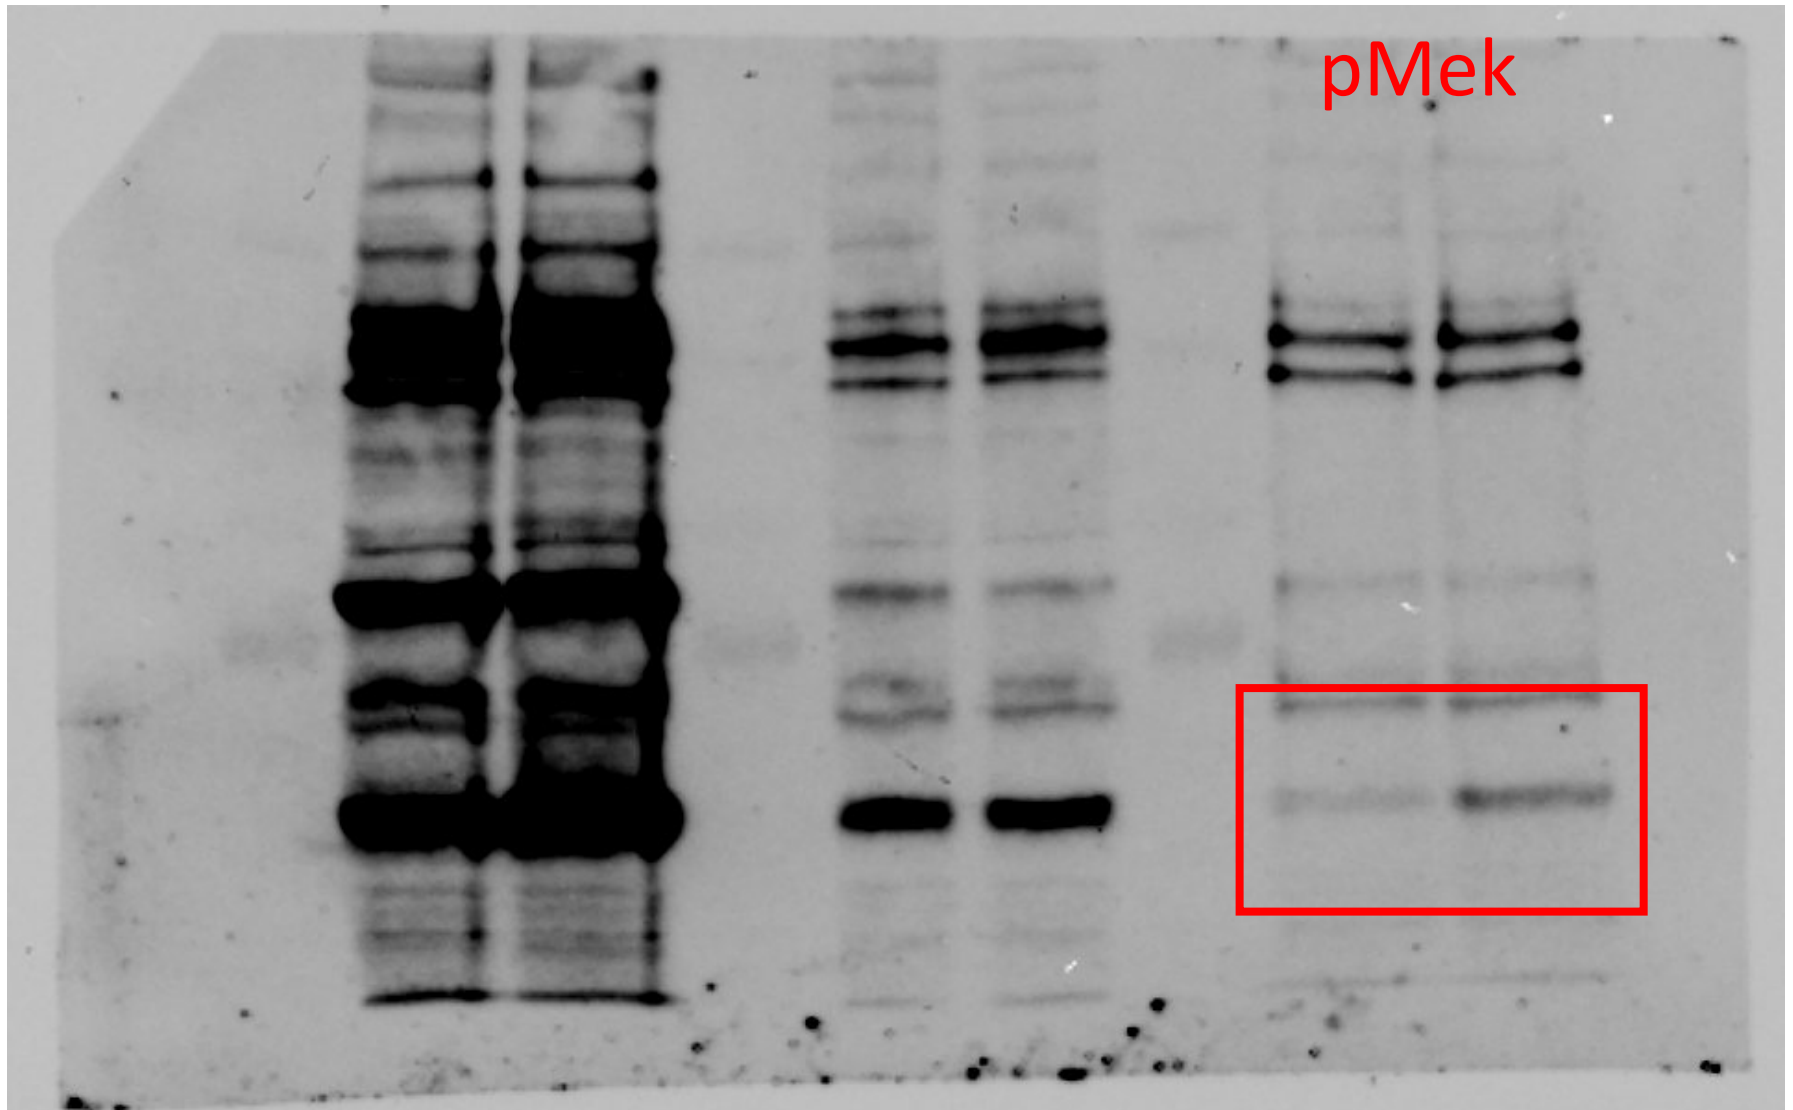



Full unedited gel for Figure 2B – A375 + FLCM

GAPDH

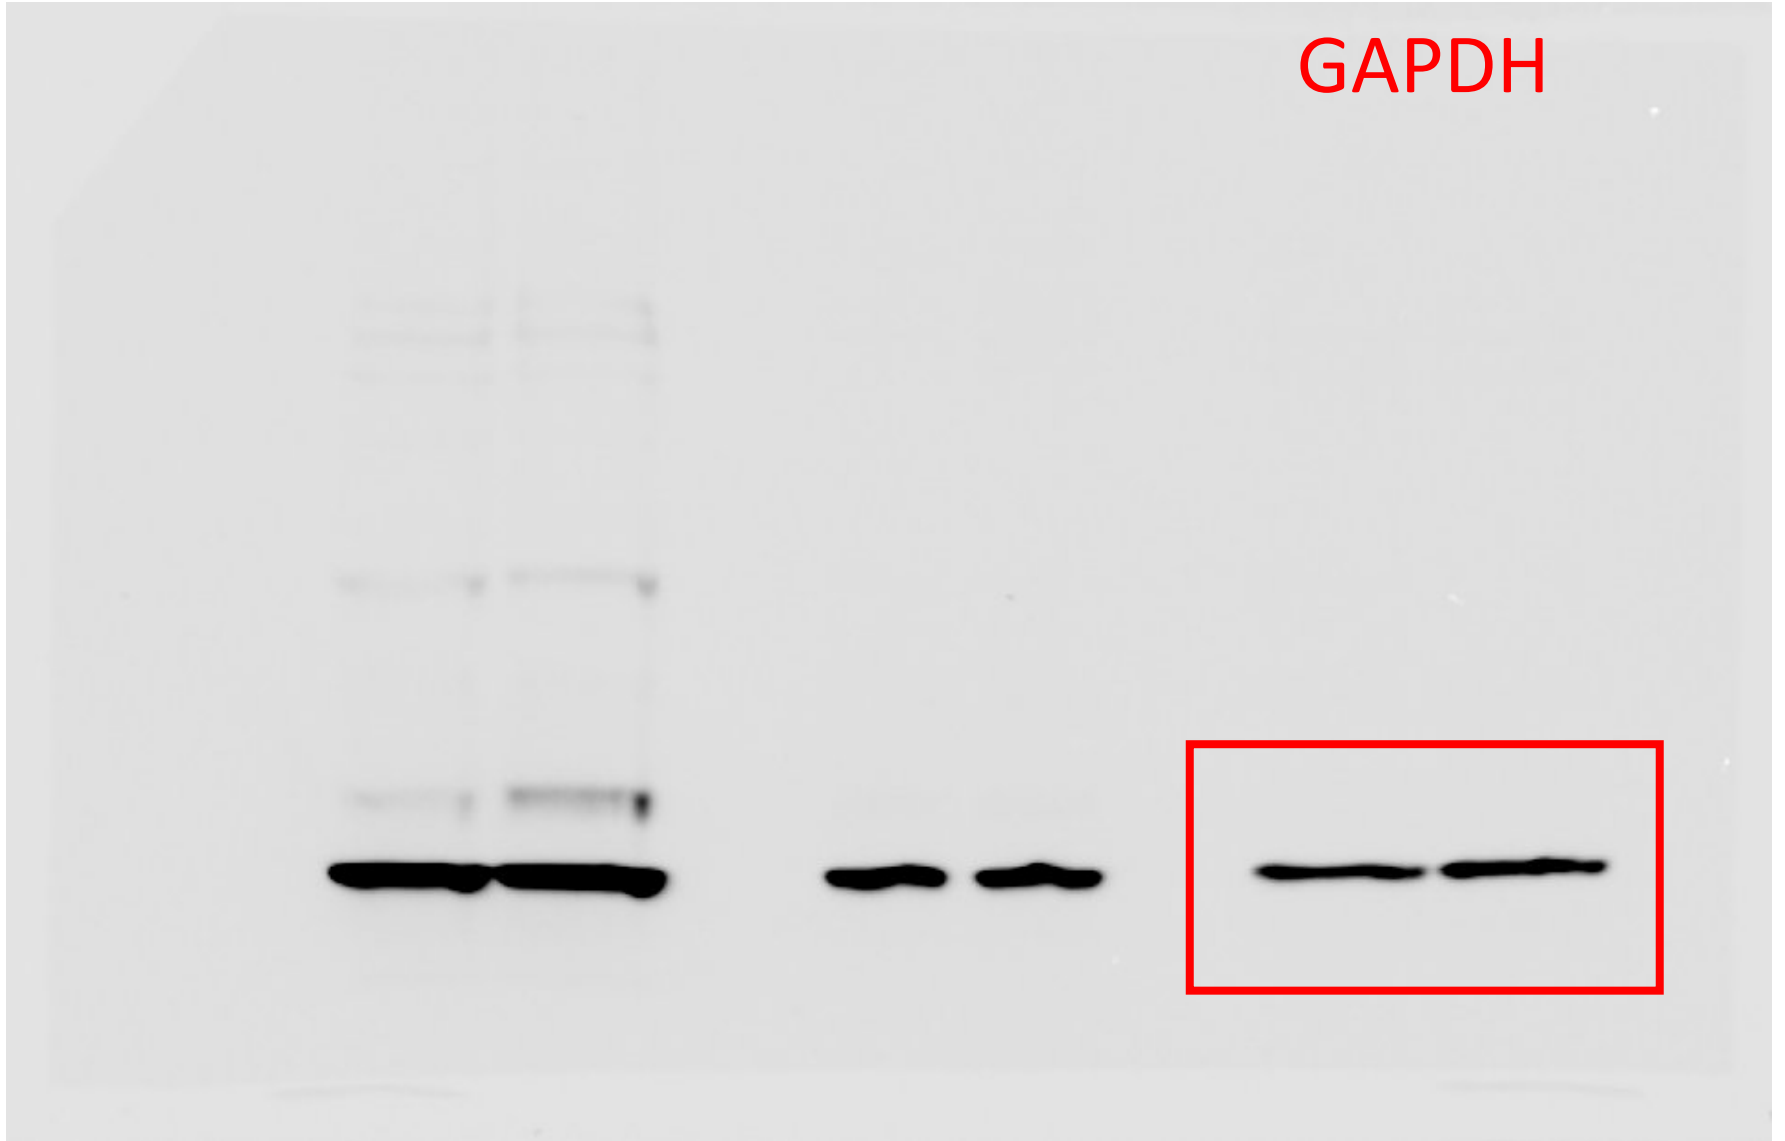

Full unedited gel for Figure 2C

Full unedited gel for Figure 2C - M202

SREBP

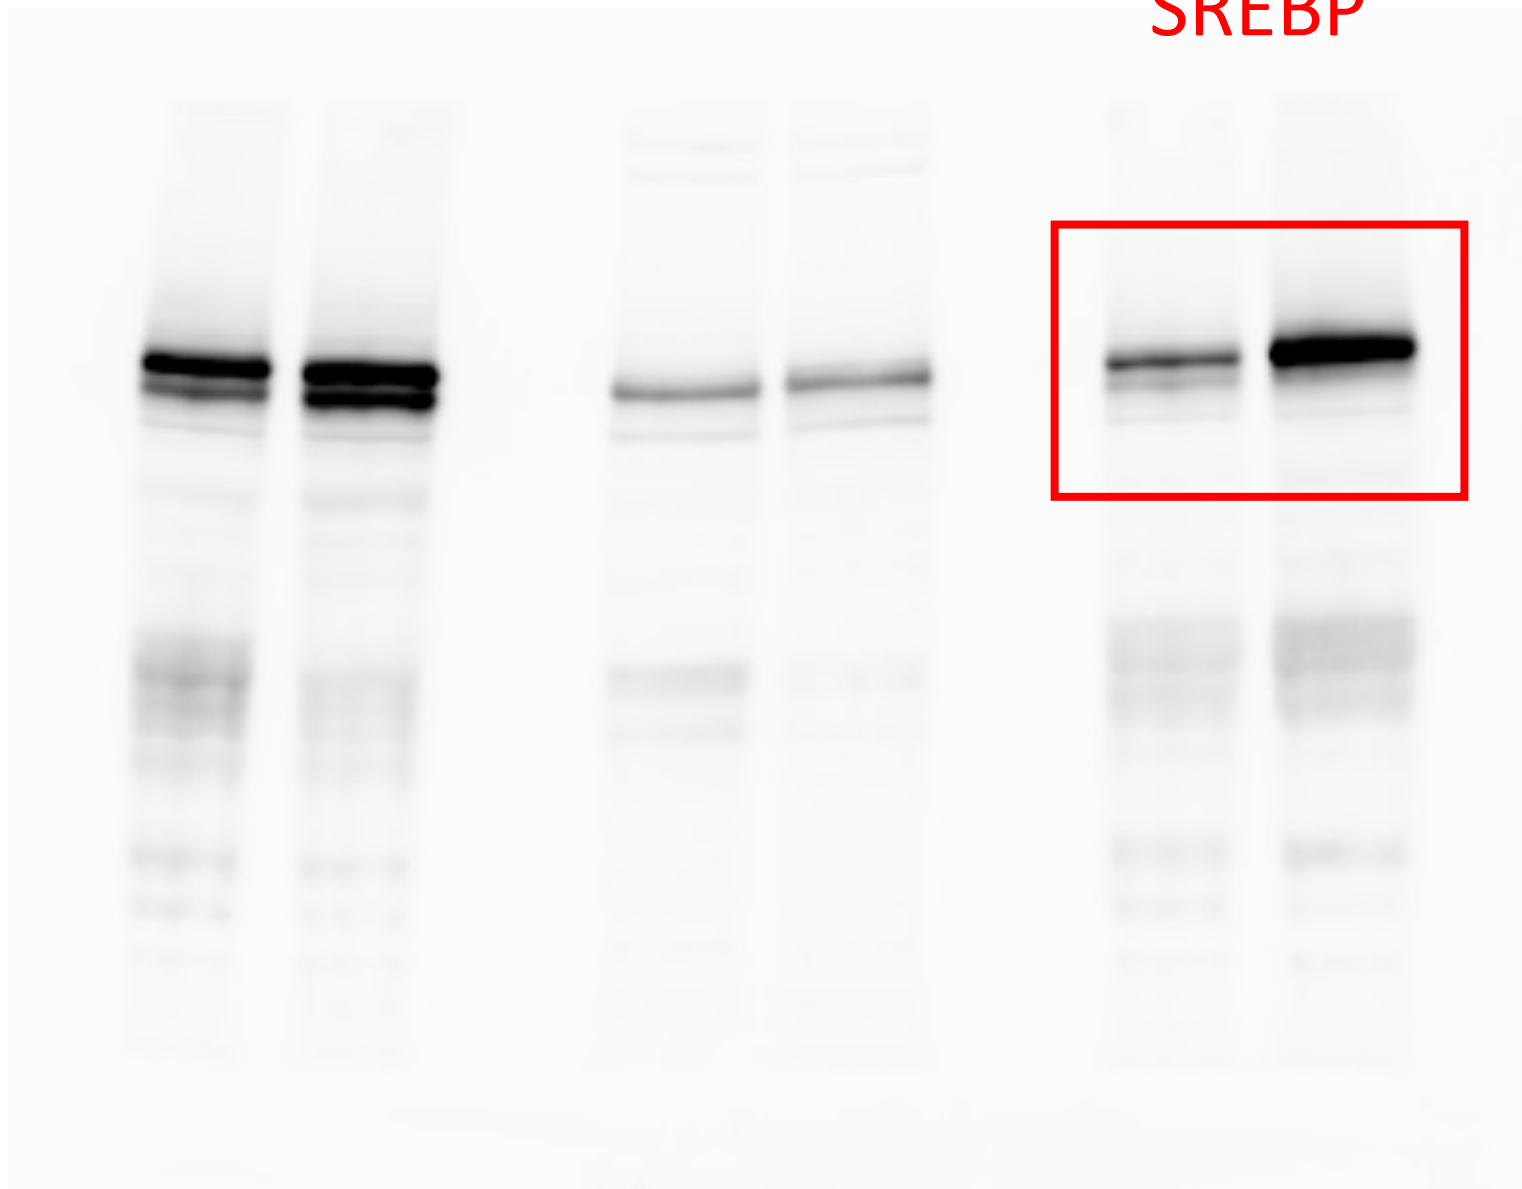

Full unedited gel for Figure 2C - M202

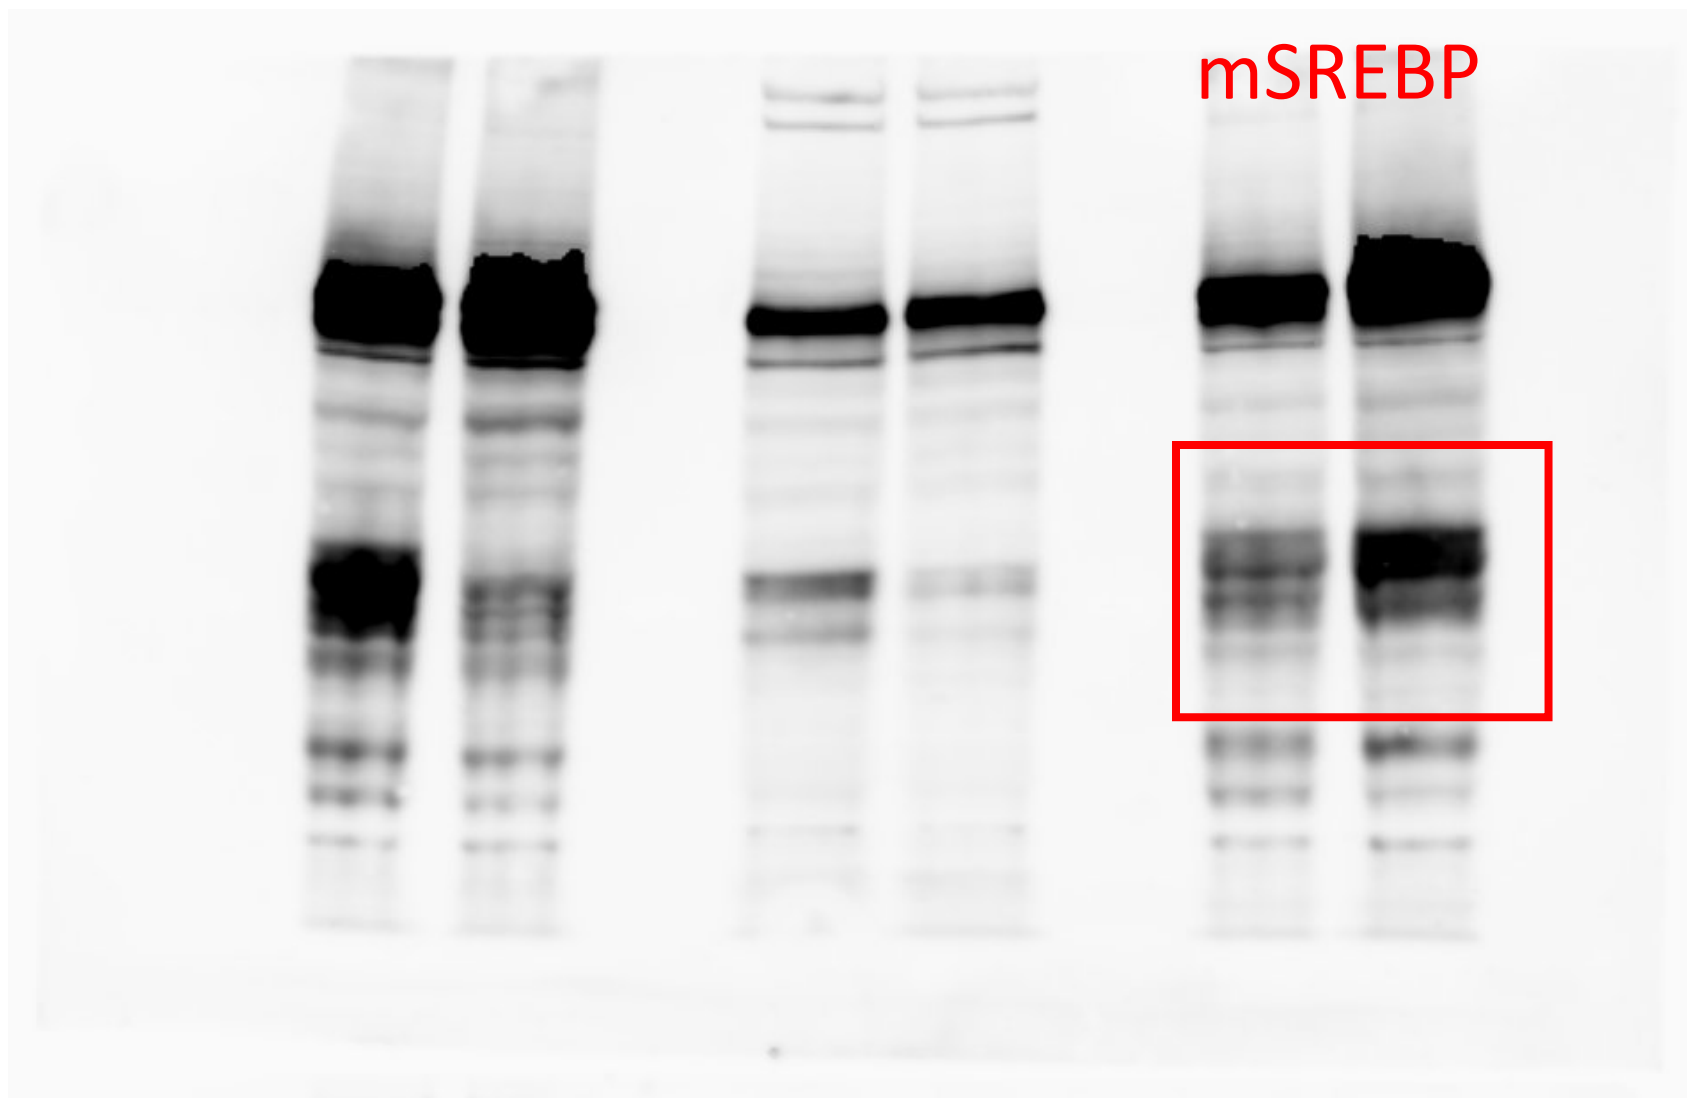

Full unedited gel for Figure 2C - M202

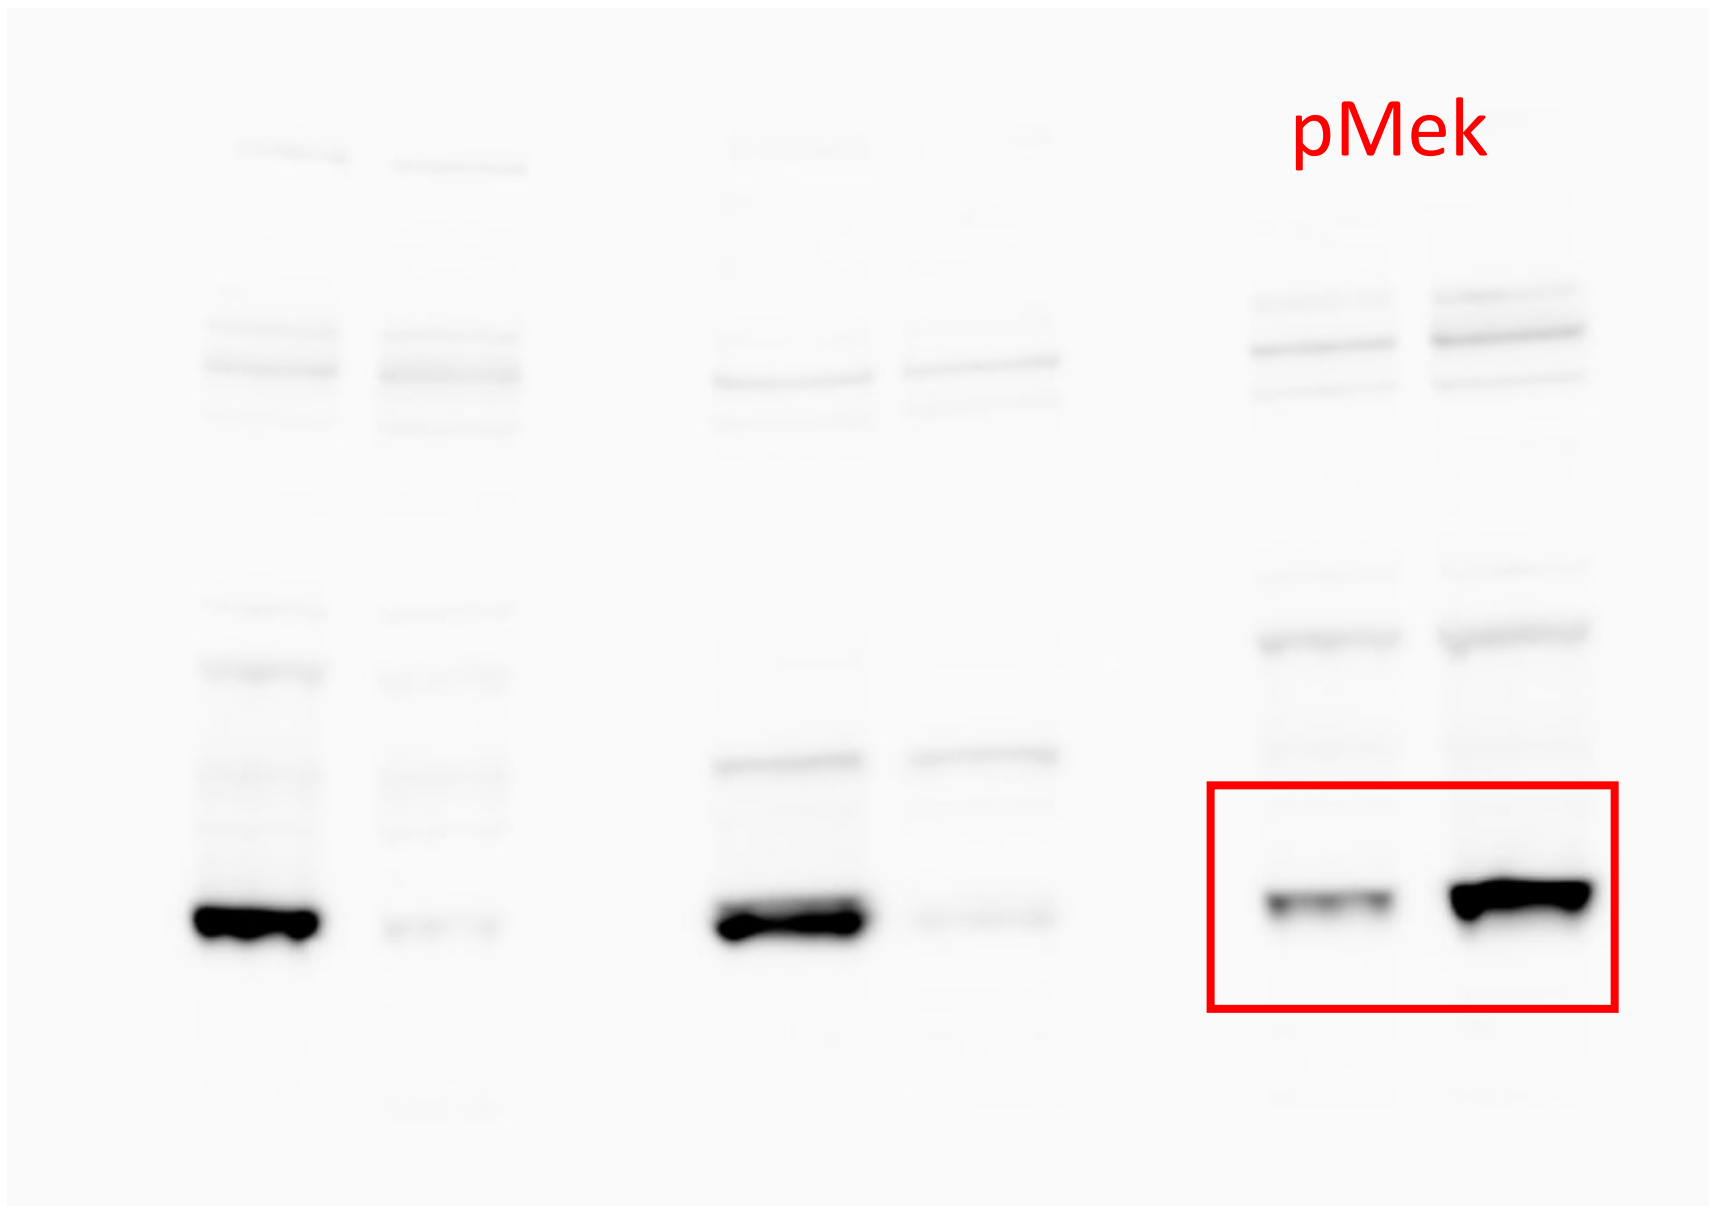

Full unedited gel for Figure 2C - M202

GAPDH

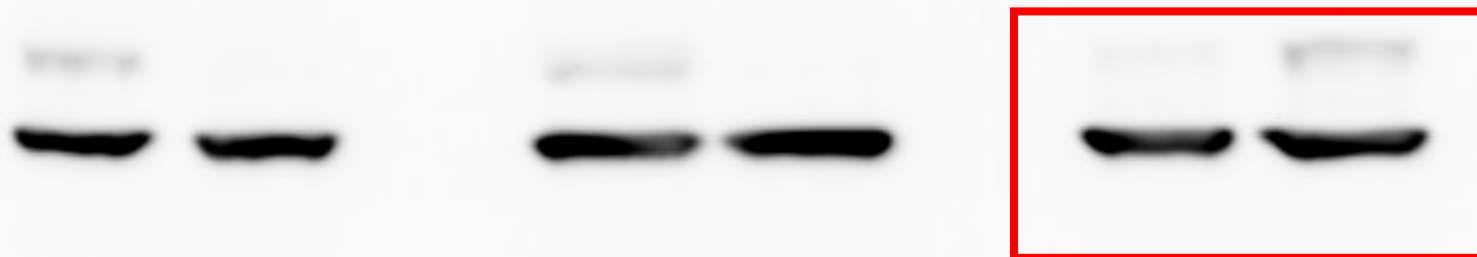

Full unedited gel for Figure 2C - M207

SREBP

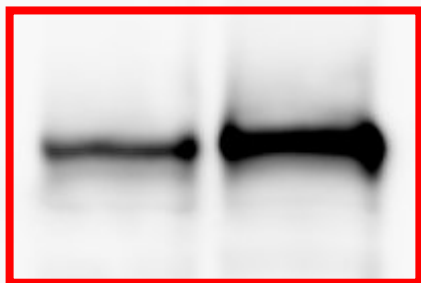

Full unedited gel for Figure 2C - M207

mSREBP

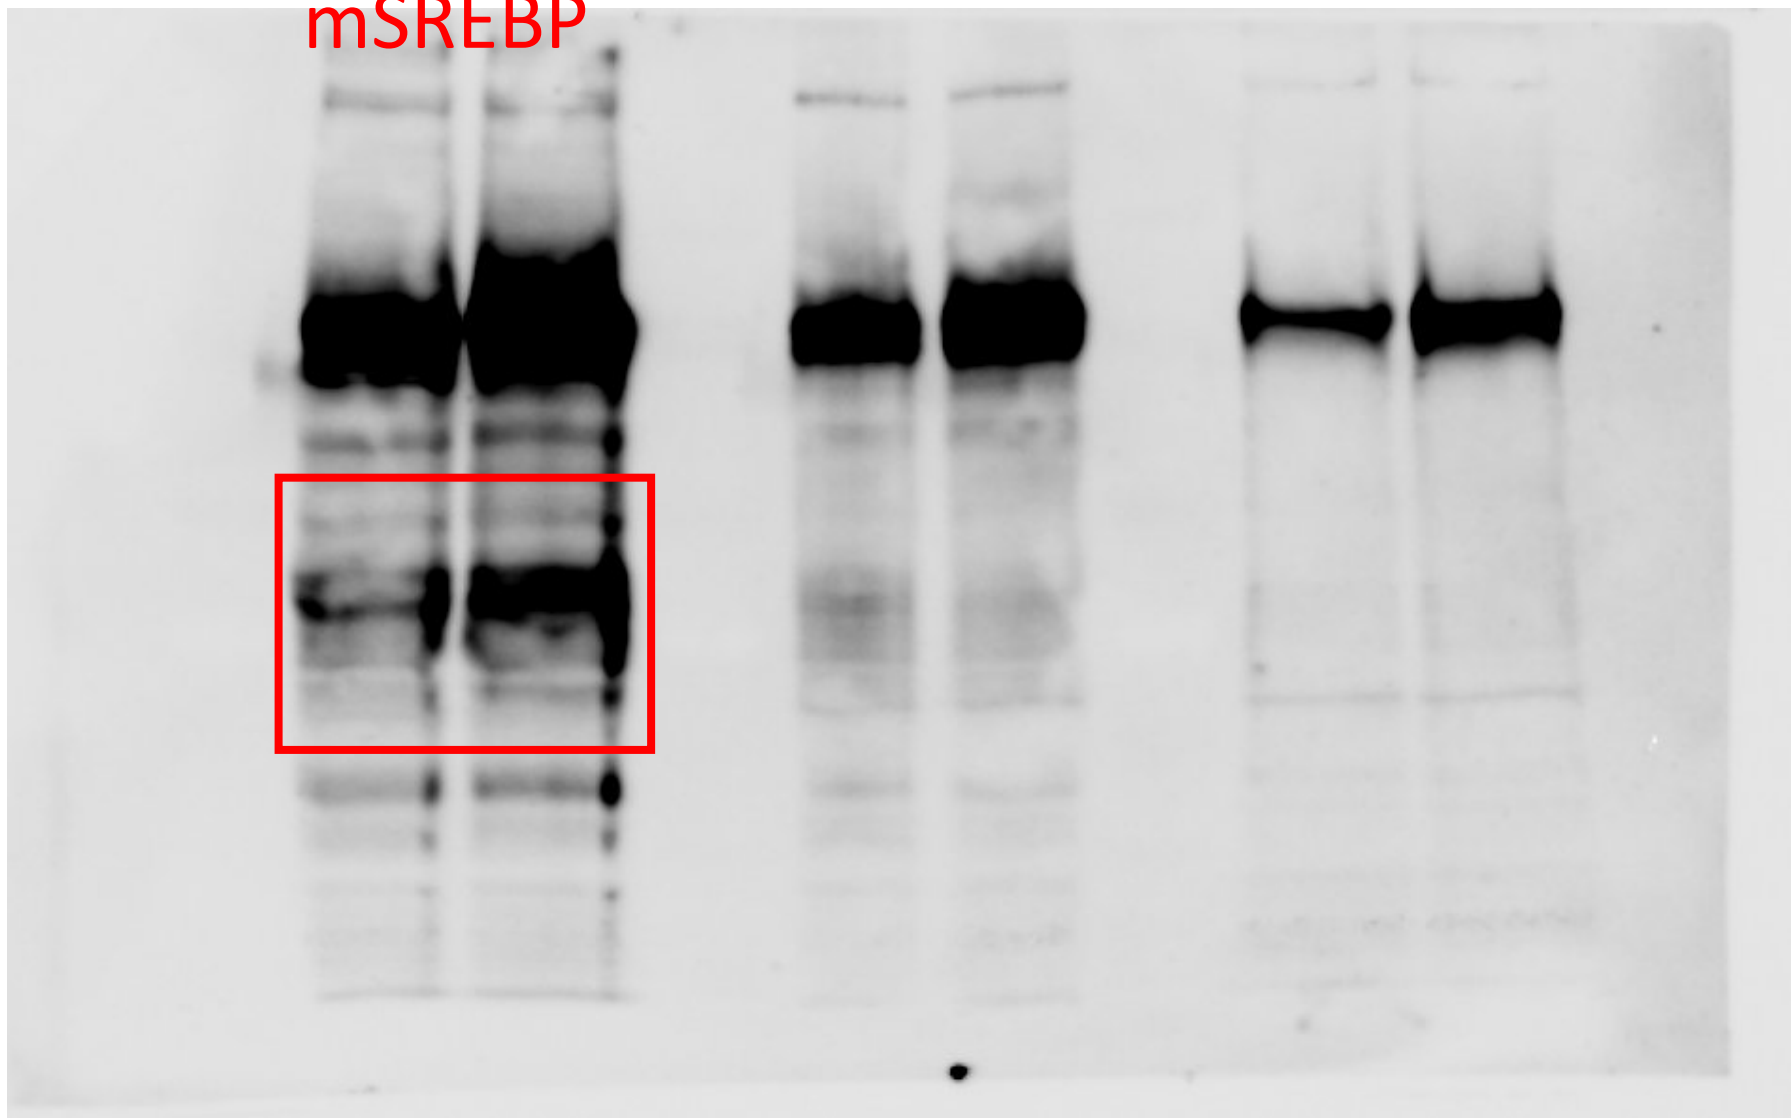



Full unedited gel for Figure 2C - M207

pMek

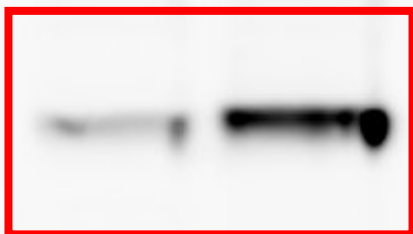

Full unedited gel for Figure 2C - M207

GAPDH

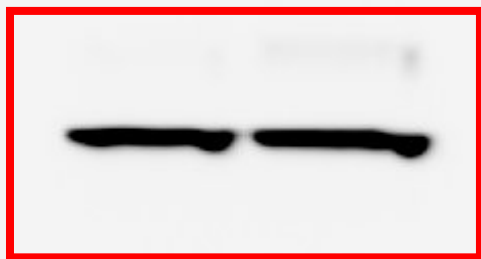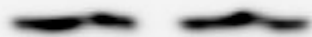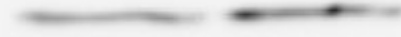

Full unedited gel for Figure 2D

Full unedited gel for Figure 2D - M202

SREBP

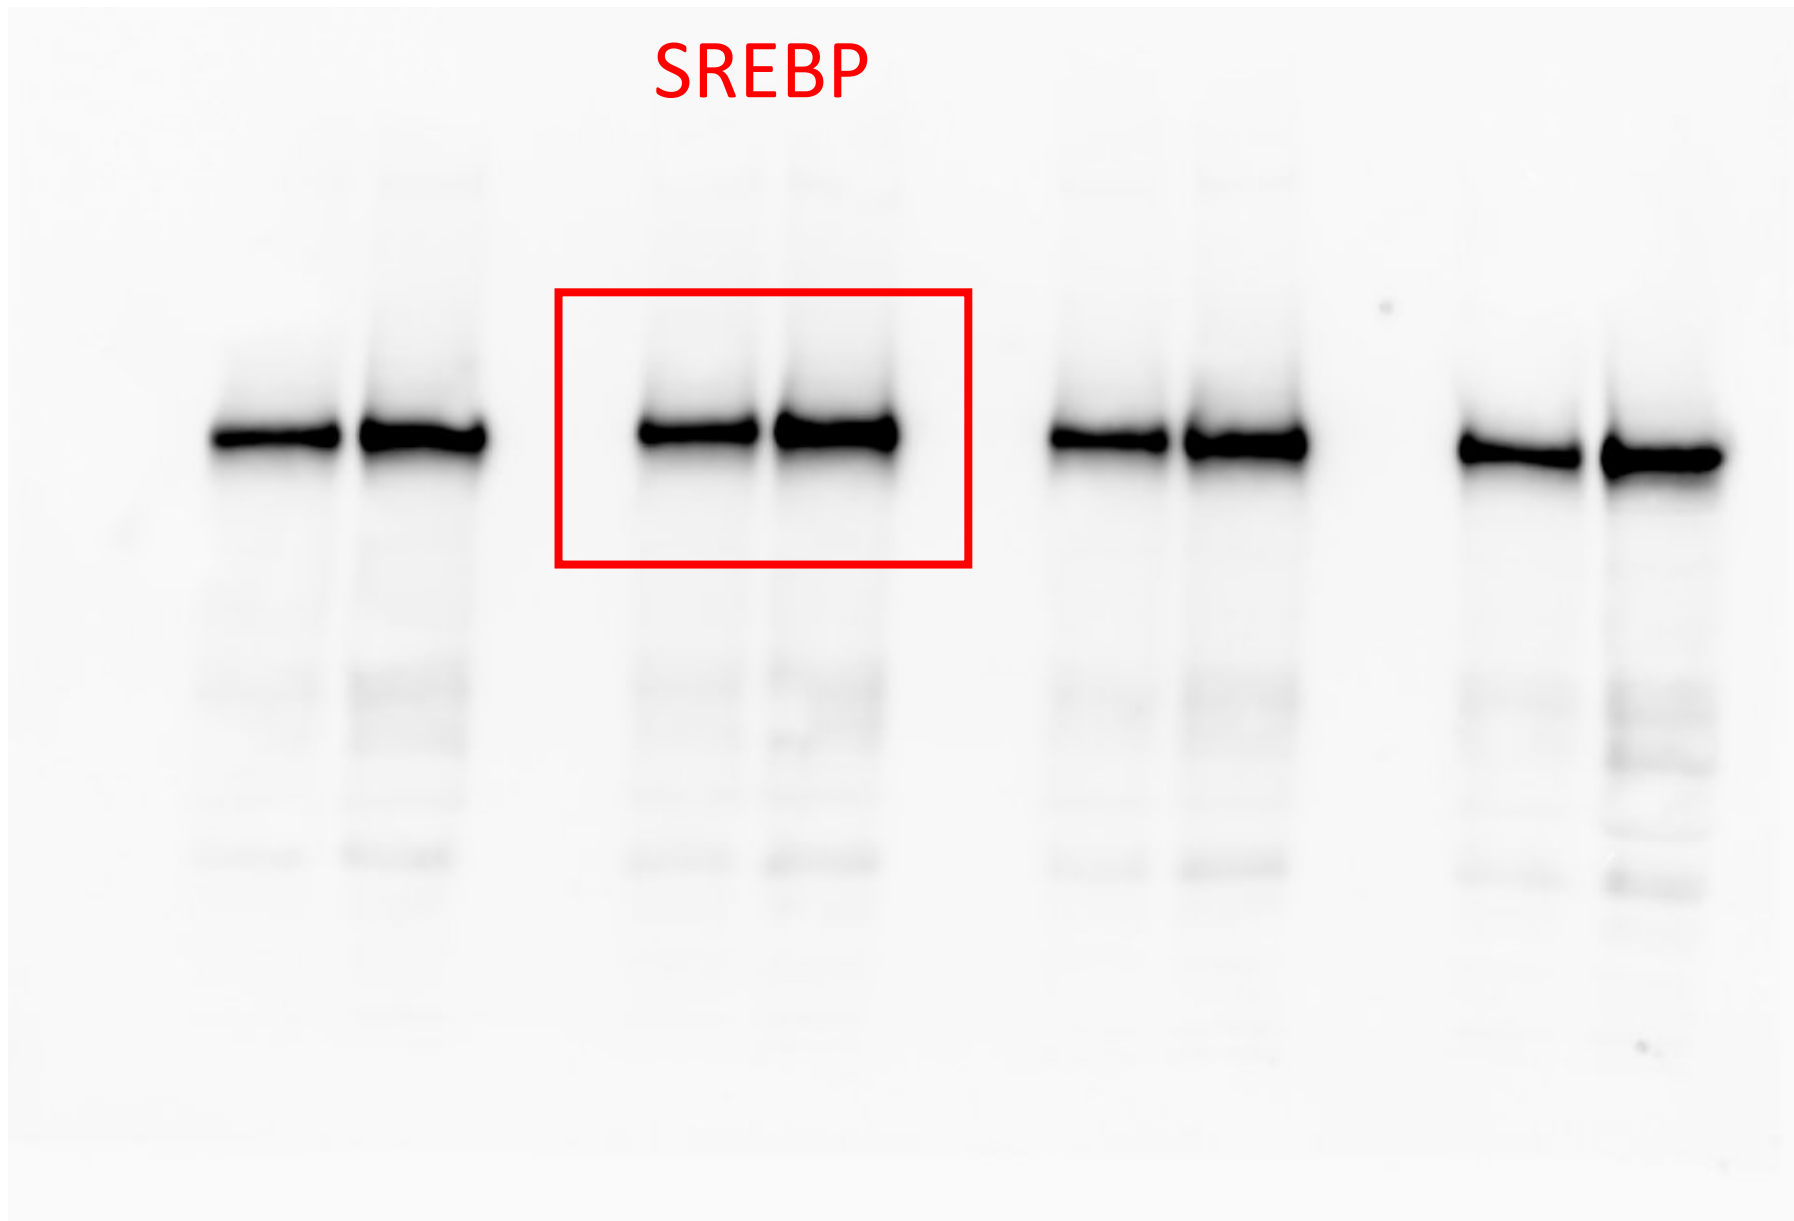

Full unedited gel for Figure 2D - M202

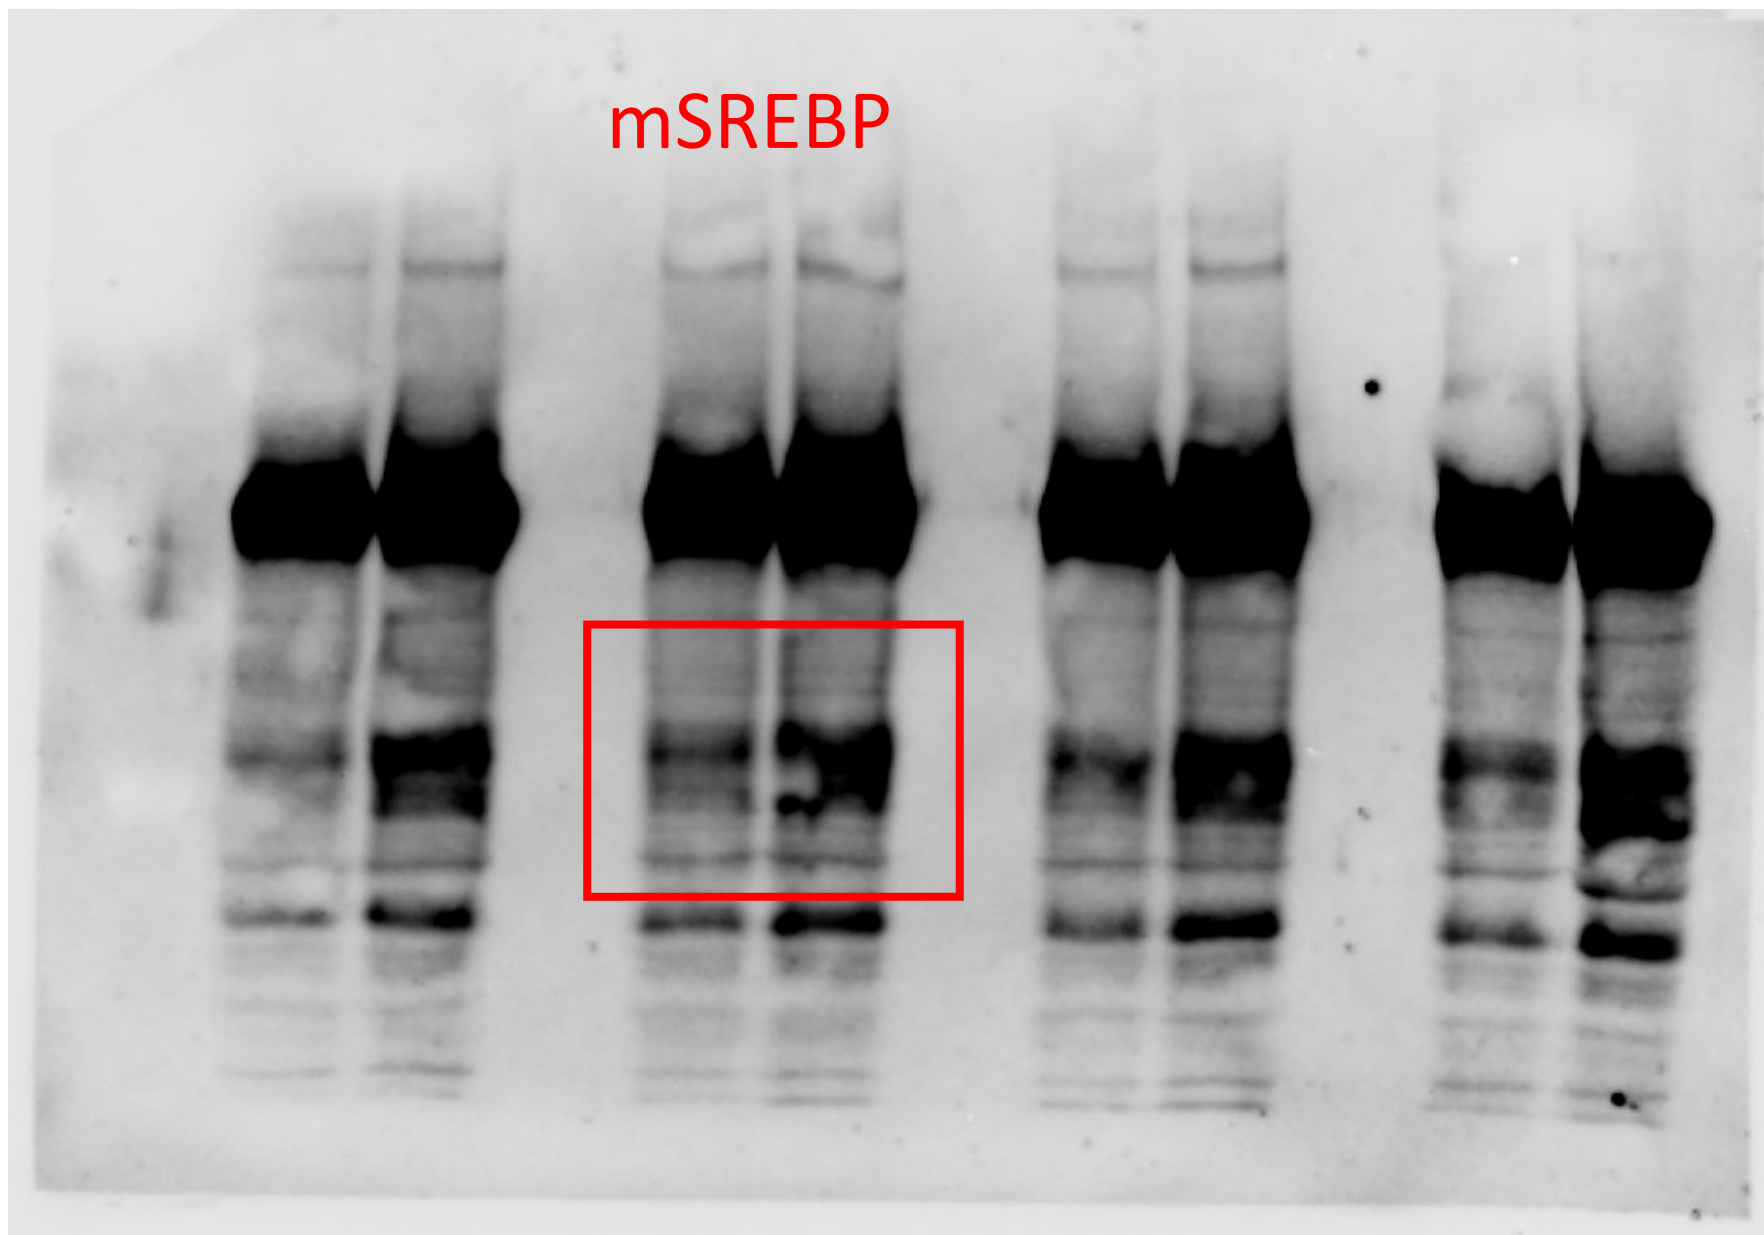

Full unedited gel for Figure 2D - M202

pMek

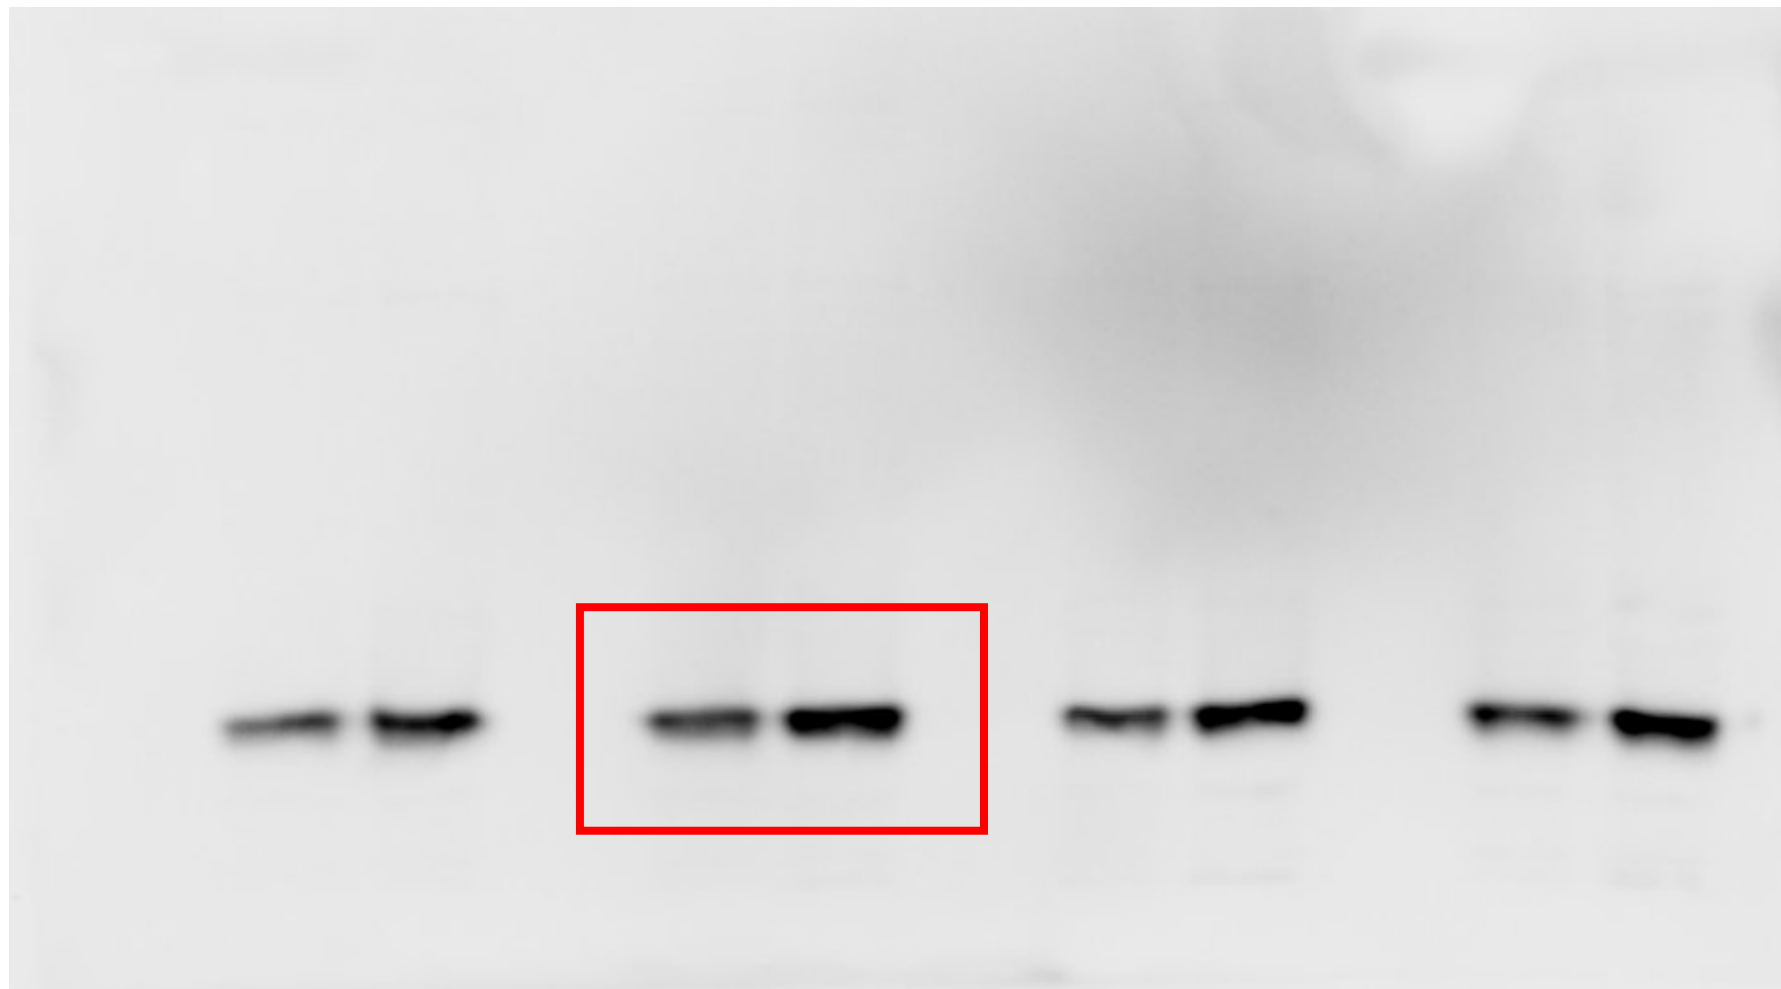

Full unedited gel for Figure 2D - M202

GAPDH

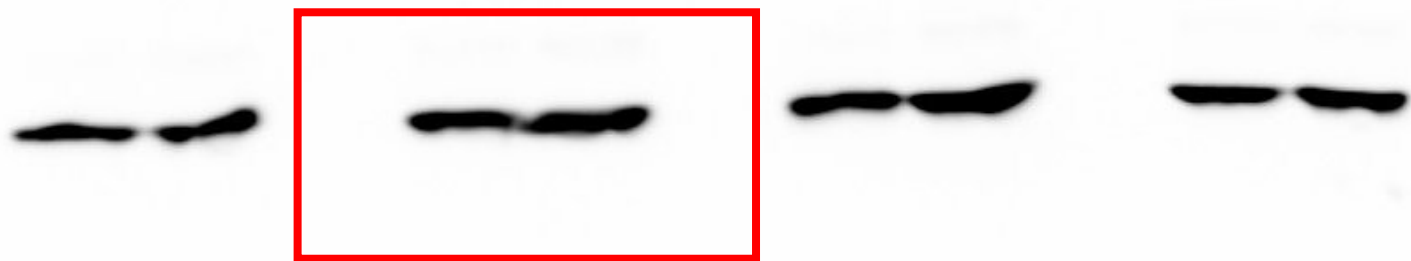

Full unedited gel for Figure 2D - M207

SREBP

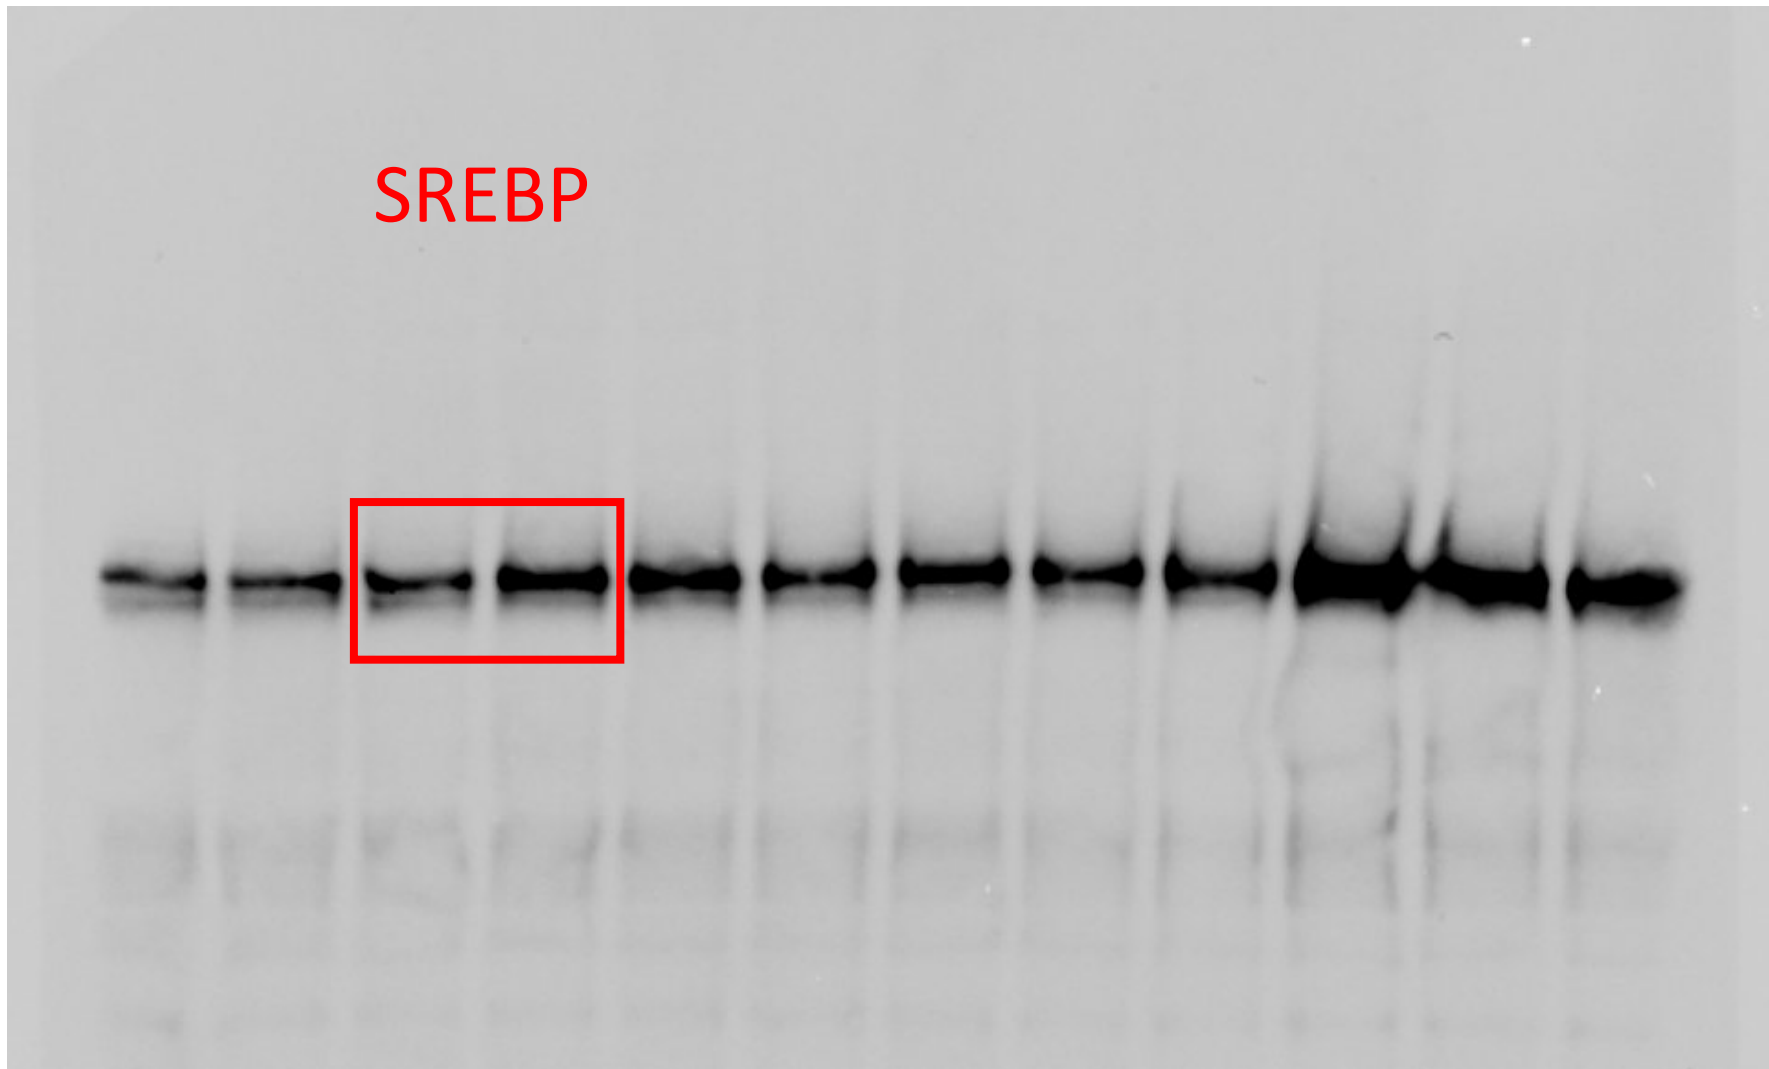



Full unedited gel for Figure 2D - M207

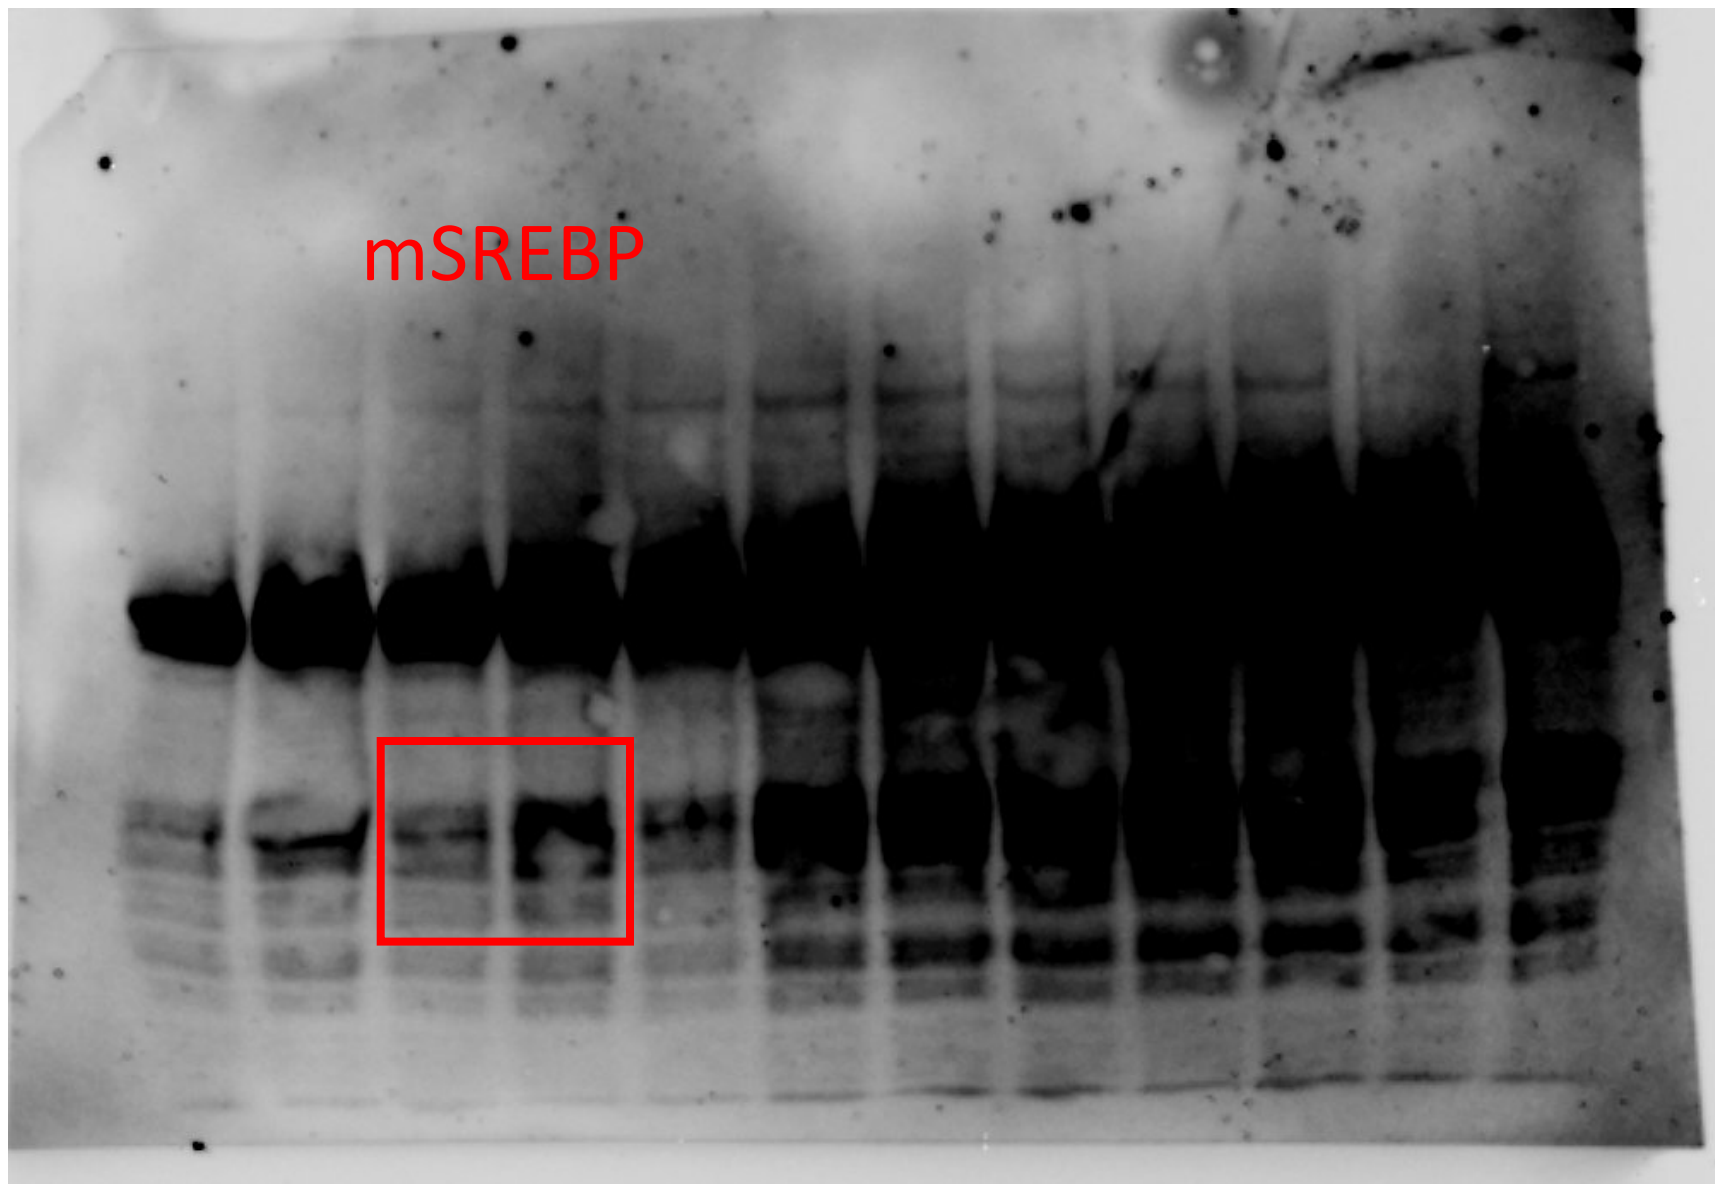

Full unedited gel for Figure 2D - M207

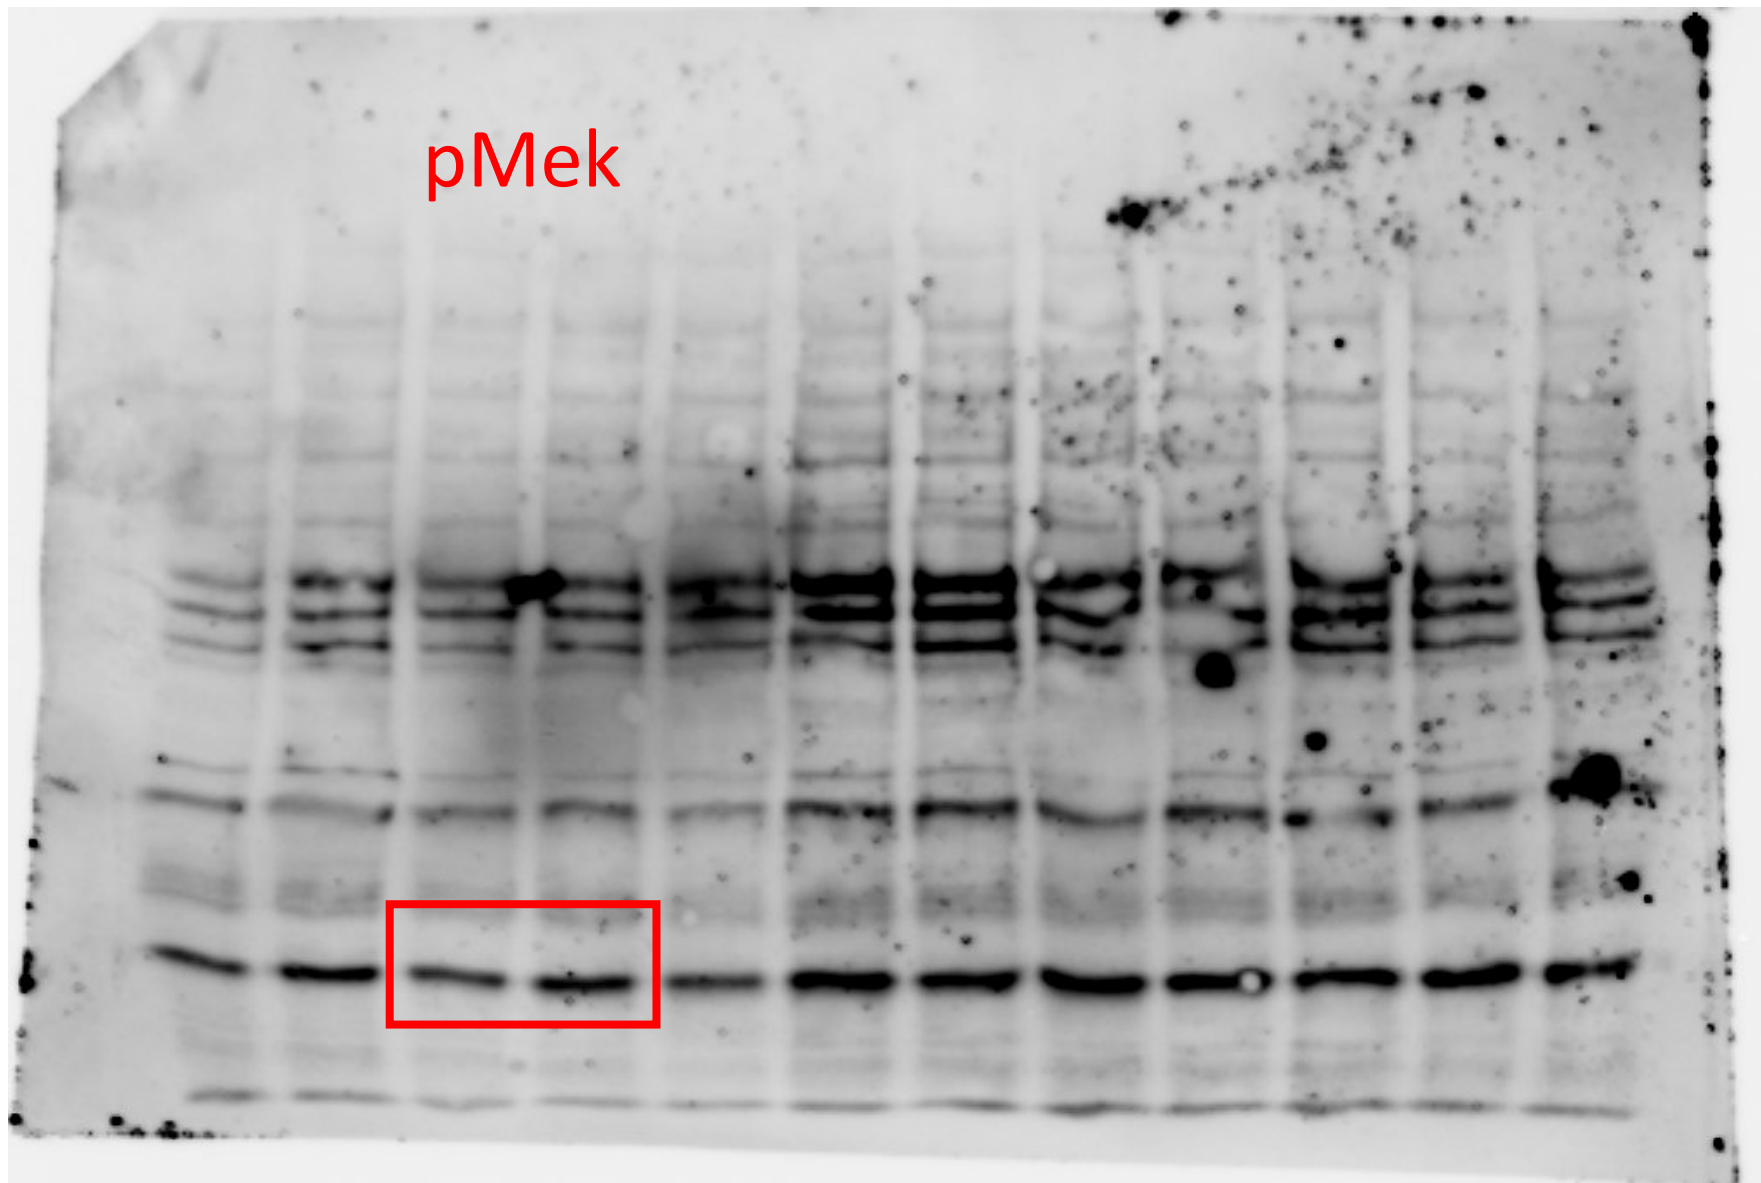

Full unedited gel for Figure 2D - M207

GAPDH

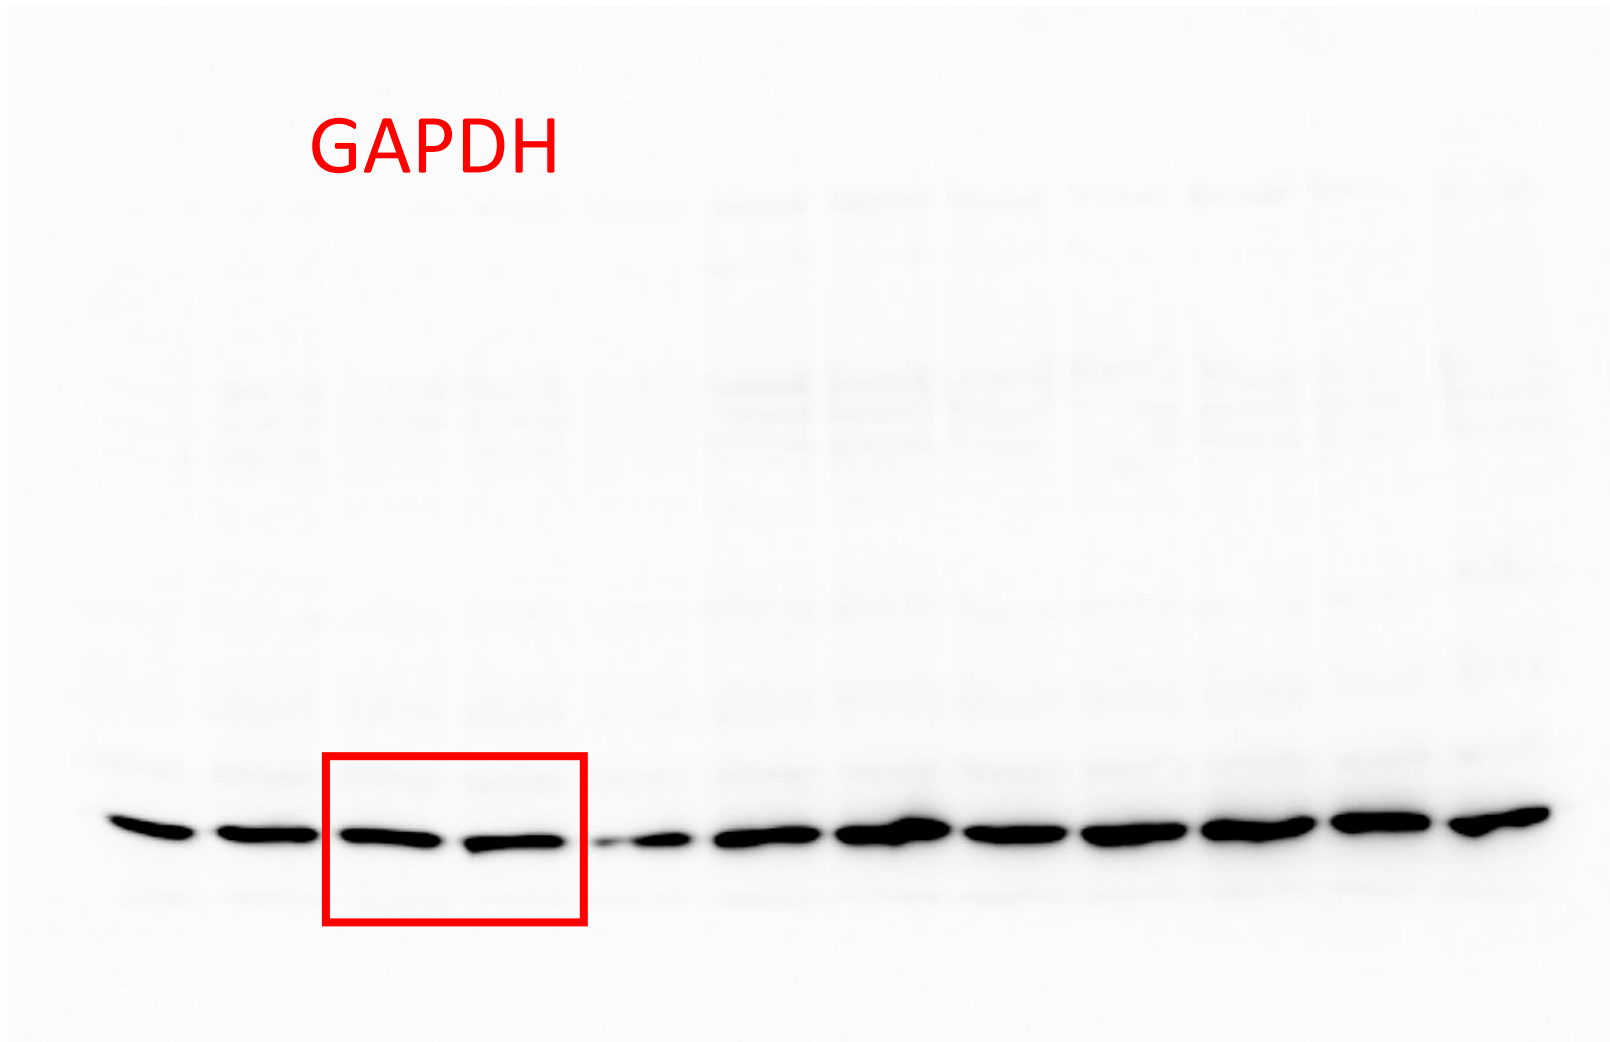

Supplement: 41467_2018_4664_MOESM4_ESM.pdf [file 41467_2018_4664_MOESM4_ESM.pdf]
