# Supplementary material for: Sustained SREBP-1-dependent lipogenesis as a key mediator of resistance to BRAF-targeted therapy
Source: PubMed Central journal article supplement (PMC6021375; doi:10.1038/s41467-018-04664-0), 2018-06-27
Supplement: 41467_2018_4664_MOESM3_ESM.pdf [file 41467_2018_4664_MOESM3_ESM.pdf]

## Description of Additional Supplementary Files

**File Name: Supplementary Data 1**

**Description:** a collection of the full uncropped western blots of all the blots shown in the main figures.
